# Supplementary material for: The Path to Poverty Reduction: How Economic Growth and Fiscal Policy Influence Poverty through Inequality in Indonesia?
Source: Preprints.org preprint supplement (doi:10.20944/preprints202410.1927.v1), 2024-10-25
Supplement: Supplementary file 1 [file supplementary]

## Sheet: Sheet1
Code	Year	Province	Poverty	Gini	Growth	GDP Percapita	Investment	Population	trade	eduhealth_expenditure	Socialprotection_exp	Tax	LN_investment	LN_eduhealth_expenditure	LN_Socialprotection_exp	LN_Tax	LN_Capita	PROVINCE_ID	Growth_GDPcapita	Covid
11	2010	ACEH	20.98	0.301		22.4501	81.93	2.36	101.66	6029.87	259.873	623.658	4.418	8.70465	5.56403	6.4372	3.1113	ACEH		0
11	2011	ACEH	19.57	0.326	3.28	22.7048	463.04	2.77234	104.86	6986.01	304.765	750.241	6.13997	8.85181	5.72282	6.62173	3.12258	ACEH	1.13434	0
11	2012	ACEH	18.58	0.341	3.85	23.0991	1726.07	2.07837	107.01	7910.24	369.057	856.645	7.45418	8.97604	5.91366	6.75419	3.1398	ACEH	1.73677	0
11	2013	ACEH	17.72	0.331	2.61	23.2286	4784.22	2.03606	106.95	9788.3	535.861	972.125	8.47329	9.18905	6.28574	6.88051	3.14538	ACEH	0.560454	0
11	2014	ACEH	16.98	0.337	1.55	23.129	5497.58	1.99543	108.69	12810.1	425.727	1304.26	8.61225	9.45807	6.05614	7.17416	3.14109	ACEH	-0.428567	0
11	2015	ACEH	17.11	0.339	-0.73	22.5243	4484.72	1.93601	114.42	10356.5	751.234	1477.99	8.40865	9.24547	6.62305	7.29911	3.1146	ACEH	-2.61459	0
11	2016	ACEH	16.43	0.341	3.29	22.8353	4263.3	2.01	115.52	14543.9	760.602	1624.89	8.35803	9.585	6.63542	7.39381	3.12831	ACEH	1.38064	0
11	2017	ACEH	15.92	0.329	4.18	23.3629	1097.73	1.98	117.24	16617.5	818.012	1717.13	7.00191	9.71827	6.7081	7.44899	3.15115	ACEH	2.3105	0
11	2018	ACEH	15.68	0.318	4.61	24.0138	2001.18	1.96	117.32	16234.6	647.5	1728.34	7.60199	9.69496	6.47466	7.4555	3.17863	ACEH	2.786	0
11	2019	ACEH	15.01	0.321	4.14	24.8423	5518.1	1.93	118.69	18673.8	670.984	1902.77	8.61597	9.83493	6.51023	7.55159	3.21255	ACEH	3.45014	0
11	2020	ACEH	15.43	0.319	-0.37	25.0183	8962.29	1.56	121.7	17617	558.265	1929.1	9.10089	9.77668	6.32662	7.56533	3.21961	ACEH	0.708389	1
11	2021	ACEH	15.53	0.323	2.81	25.3565	10805.4	1.49	117.41	18512.7	602.461	2012.27	9.28789	9.82627	6.40268	7.60752	3.23303	ACEH	1.35169	1
11	2022	ACEH	14.75	0.291	4.21	26.0615	6431.98	1.43	120.92	17336.8	403.764	2236.8	8.76919	9.76064	6.0033	7.71325	3.26046	ACEH	2.78067	1
11	2023	ACEH	14.45	0.296	4.23	26.8001	12716.2	1.41	130.26	17063.5	376.78	2267.09	9.45071	9.74475	5.93431	7.72669	3.28841	ACEH	2.83406	1
12	2010	SUMATERA UTARA	11.31	0.346		25.4121	2291.07	1.1	80.17	9674.13	269.545	2832.37	7.73721	9.17731	5.60044	7.94922	3.23522	SUMATERA UTARA		0
12	2011	SUMATERA UTARA	11.33	0.305	6.66	26.7112	8507.56	1.83944	81.31	12257.8	380.418	4160.51	9.04883	9.414	5.9439	8.33363	3.28508	SUMATERA UTARA	5.11241	0
12	2012	SUMATERA UTARA	10.41	0.331	6.45	28.0369	8790.53	1.41442	79.41	12616.7	445.637	5029.92	9.08154	9.44285	6.10175	8.52336	3.33352	SUMATERA UTARA	4.96285	0
12	2013	SUMATERA UTARA	10.39	0.328	6.07	29.3392	15886	1.3574	76.2	14344	555.03	5192.79	9.67326	9.57116	6.32082	8.55522	3.37892	SUMATERA UTARA	4.64506	0
12	2014	SUMATERA UTARA	9.85	0.31	5.23	30.4771	11076.2	1.30243	78.1	16882	511.885	5772.65	9.31264	9.73406	6.24005	8.66106	3.41697	SUMATERA UTARA	3.87829	0
12	2015	SUMATERA UTARA	10.79	0.326	5.1	31.6374	21477.3	1.2421	69.88	10069.5	281.632	6315.38	9.9748	9.21737	5.64415	8.7509	3.45434	SUMATERA UTARA	3.80726	0
12	2016	SUMATERA UTARA	10.27	0.312	5.18	32.8851	18497.1	1.33	70.39	21197.4	741.135	6573.71	9.82543	9.96168	6.60953	8.79099	3.49302	SUMATERA UTARA	3.94369	0
12	2017	SUMATERA UTARA	9.28	0.335	5.12	34.1836	32208.1	1.3	70.19	21553.1	905.409	7480.76	10.38	9.97832	6.80949	8.92022	3.53175	SUMATERA UTARA	3.94857	0
12	2018	SUMATERA UTARA	8.94	0.311	5.18	35.5705	26148.8	1.27	70.33	23294	738.023	7874.45	10.1716	10.056	6.60533	8.97151	3.57152	SUMATERA UTARA	4.05727	0
12	2019	SUMATERA UTARA	8.63	0.315	5.22	36.8536	25025.1	1.24	60.92	24885.9	871.039	8184.62	10.1277	10.1221	6.77083	9.01013	3.60695	SUMATERA UTARA	3.60717	0
12	2020	SUMATERA UTARA	9.14	0.314	-1.07	36.1752	31938.6	1.28	58.73	25140	679.812	7798.45	10.3716	10.1323	6.52329	8.96181	3.58837	SUMATERA UTARA	-1.84088	1
12	2021	SUMATERA UTARA	8.49	0.313	2.61	36.5821	26766.5	1.23	68.15	26235.1	838.31	9046.73	10.1949	10.1749	6.73258	9.11027	3.59956	SUMATERA UTARA	1.12483	1
12	2022	SUMATERA UTARA	8.33	0.326	4.73	37.7806	43493.2	1.21	72.33	21341.9	533.68	10505.8	10.6804	9.96847	6.28167	9.25978	3.63179	SUMATERA UTARA	3.27614	1
12	2023	SUMATERA UTARA	8.15	0.309	5.01	39.1402	39784.7	1.43	64.1	26200.5	535.717	12883.3	10.5913	10.1736	6.28547	9.46377	3.66715	SUMATERA UTARA	3.59878	1
13	2010	SUMATERA BARAT	9.5	0.325		21.5849	144.85	1.34	149.53	5149.01	190.126	909.815	4.98258	8.54675	5.25293	6.81434	3.07199	SUMATERA BARAT		0
13	2011	SUMATERA BARAT	9.04	0.332	6.34	22.6388	1234.15	1.77639	151.34	6073.66	216.608	1185.69	7.11895	8.71188	5.38269	7.07893	3.11966	SUMATERA BARAT	4.8823	0
13	2012	SUMATERA BARAT	8	0.355	6.31	23.744	1610.72	1.3582	224.12	6851.2	259.98	1244.18	7.38506	8.83232	5.56444	7.12703	3.16733	SUMATERA BARAT	4.88216	0
13	2013	SUMATERA BARAT	7.56	0.351	6.08	24.8576	1791.39	1.34	139.13	7178.55	305.878	1390.1	7.49131	8.87899	5.72645	7.23785	3.21317	SUMATERA BARAT	4.69015	0
13	2014	SUMATERA BARAT	6.89	0.332	5.88	25.9828	1815.77	1.28281	145.4	7752.3	315.607	1708.02	7.50482	8.95587	5.75766	7.44368	3.25744	SUMATERA BARAT	4.52654	0
13	2015	SUMATERA BARAT	6.71	0.319	5.53	27.0808	2340.64	1.24708	127.63	2420.61	86.9434	1865.58	7.75861	7.79219	4.47669	7.53186	3.29882	SUMATERA BARAT	4.2256	0
13	2016	SUMATERA BARAT	7.14	0.312	5.27	28.1649	4860.62	1.31	114.46	11289.9	309.74	1997.88	8.48913	9.33175	5.73896	7.60034	3.33808	SUMATERA BARAT	4.00347	0
13	2017	SUMATERA BARAT	6.75	0.312	5.3	29.3122	4151.04	1.29	112.54	12116	417.155	2232.71	8.33136	9.40236	6.03585	7.71142	3.378	SUMATERA BARAT	4.07329	0
13	2018	SUMATERA BARAT	6.55	0.305	5.14	30.4708	4927.61	1.27	121.9	13016.5	402.359	2482.25	8.50281	9.47405	5.99983	7.81733	3.41677	SUMATERA BARAT	3.95273	0
13	2019	SUMATERA BARAT	6.29	0.307	5.01	31.4273	5210.69	1.25	116.4	14027.8	447.006	2605.19	8.55866	9.54887	6.10481	7.86564	3.44768	SUMATERA BARAT	3.13904	0
13	2020	SUMATERA BARAT	6.56	0.301	-1.61	30.6962	4877.62	1.29	90.46	13645	341.242	2462.1	8.49262	9.5212	5.83552	7.80918	3.42414	SUMATERA BARAT	-2.32626	1
13	2021	SUMATERA BARAT	6.04	0.3	3.29	31.265	5139.01	1.1	92.05	13847.6	415.414	2786.16	8.54481	9.53594	6.03168	7.93278	3.4425	SUMATERA BARAT	1.8529	1
13	2022	SUMATERA BARAT	6.04	0.292	4.36	32.1669	4064.02	1.09	103.93	12527.1	286.787	3110.86	8.31017	9.43573	5.66222	8.04298	3.47094	SUMATERA BARAT	2.88476	1
13	2023	SUMATERA BARAT	5.95	0.28	4.62	33.1882	6348.3	1.45	102.24	14467	333.912	3633.38	8.7561	9.5797	5.81387	8.19819	3.50219	SUMATERA BARAT	3.17503	1
14	2010	RIAU	8.65	0.326		69.701	1816.05	3.58	64.76	5645.94	259.206	1607.43	7.50497	8.63887	5.56147	7.38301	4.24422	RIAU		0
14	2011	RIAU	8.47	0.324	5.57	71.6379	9388.08	3.38726	65.81	7252.01	299.669	2098.29	9.1473	8.88917	5.70601	7.64935	4.27162	RIAU	2.77881	0
14	2012	RIAU	8.05	0.383	3.76	72.3963	16598.5	2.67202	63.27	7922.26	383.783	2469.7	9.71713	8.97756	5.95268	7.81225	4.28216	RIAU	1.05873	0
14	2013	RIAU	8.42	0.393	2.48	72.297	20780.3	2.61949	72.46	10385.2	487.137	2705.31	9.94181	9.24823	6.1906	7.90334	4.28078	RIAU	-0.137148	0
14	2014	RIAU	7.99	0.379	2.71	72.3909	24744.9	2.5692	71.36	8962.53	444.404	3200.58	10.1164	9.10092	6.09898	8.0714	4.28208	RIAU	0.129784	0
14	2015	RIAU	8.82	0.366	0.22	70.7698	18956.6	2.52101	46.49	6468.4	261.342	3325.62	9.84996	8.77484	5.56965	8.10971	4.25943	RIAU	-2.23937	0
14	2016	RIAU	7.67	0.347	2.18	70.5694	18291	2.59	41.86	11344.4	465.811	3226.87	9.81422	9.33657	6.14592	8.07958	4.2566	RIAU	-0.2832	0
14	2017	RIAU	7.41	0.325	2.66	70.7404	25206.3	2.57	52.37	12664.8	339.053	3855.94	10.1349	9.44666	5.8291	8.25763	4.25902	RIAU	0.242414	0
14	2018	RIAU	7.21	0.347	2.35	70.7368	24013.6	2.54	49.05	12645.5	324.649	4264.74	10.0864	9.44513	5.78582	8.35837	4.25897	RIAU	-0.00517384	0
14	2019	RIAU	6.9	0.331	2.81	72.5091	40666.3	2.52	46.09	14110.1	385.481	4402.48	10.6132	9.55472	5.95708	8.39015	4.28371	RIAU	2.50559	0
14	2020	RIAU	7.04	0.321	-1.13	76.8847	49322.8	1.4	63.18	14462.6	371.235	4054.47	10.8062	9.57939	5.91952	8.30782	4.34231	RIAU	6.03455	1
14	2021	RIAU	7	0.327	3.36	78.3192	52414.4	2.08	76.42	14024.6	434.717	4813.55	10.867	9.54864	6.07699	8.4794	4.36079	RIAU	1.86577	1
14	2022	RIAU	6.84	0.323	4.55	80.7739	86301.8	1.95	91.14	14160.1	361.418	5697.33	11.3656	9.55825	5.8928	8.64793	4.39165	RIAU	3.13415	1
14	2023	RIAU	6.68	0.324	4.21	83.0707	79726.9	1.4	85.66	14867.2	400.883	5836.12	11.2864	9.60698	5.99616	8.67199	4.41969	RIAU	2.84358	1
15	2010	JAMBI	8.34	0.304		29.1602	557.81	2.56	139.01	2826.62	118.257	675.954	6.32581	7.94719	4.78128	6.5176	3.3728	JAMBI		0
15	2011	JAMBI	8.65	0.348	7.86	30.8567	2311.5	2.44802	129.82	3401.36	144.135	962.525	7.74608	8.13222	4.97766	6.8706	3.42935	JAMBI	5.81787	0
15	2012	JAMBI	8.28	0.359	7.03	32.4177	2957.31	1.86237	118.19	3913.56	194.174	961.443	7.99237	8.27246	5.27389	6.86947	3.47871	JAMBI	5.05907	0
15	2013	JAMBI	8.42	0.327	6.84	34.0121	3217.62	1.82832	114.54	4997.54	251.384	1046.9	8.07671	8.5169	5.53095	6.95455	3.52672	JAMBI	4.91824	0
15	2014	JAMBI	8.39	0.342	7.36	35.8781	1547.93	1.76506	110.35	5378.4	248.092	1286.31	7.34532	8.59033	5.51782	7.16031	3.58013	JAMBI	5.48625	0
15	2015	JAMBI	9.12	0.344	4.21	36.7535	5026.4	1.73445	113.7	2653.44	123.699	1318.15	8.52266	7.88399	4.8259	7.18474	3.60423	JAMBI	2.44001	0
15	2016	JAMBI	8.37	0.346	4.37	37.7288	4704.25	1.8	110.77	5868.64	236.47	1307.67	8.45643	8.67755	5.47004	7.17676	3.63042	JAMBI	2.65357	0
15	2017	JAMBI	7.9	0.334	4.6	38.8339	4047.56	1.78	118.32	6690.92	243.012	1748.08	8.30612	8.80866	5.49722	7.46684	3.65929	JAMBI	2.92898	0
15	2018	JAMBI	7.85	0.335	4.69	40.0255	4351.74	1.75	121.63	7177.51	229.833	1882.59	8.37856	8.87885	5.44169	7.54093	3.68952	JAMBI	3.06858	0
15	2019	JAMBI	7.51	0.324	4.35	41.8123	5195.96	1.72	121.62	7886.37	244.397	1853.48	8.55583	8.97302	5.50288	7.52536	3.73319	JAMBI	4.46423	0
15	2020	JAMBI	7.97	0.316	-0.51	41.926	3892.05	1.34	112.28	7799.98	240.371	1751.91	8.26695	8.96201	5.48634	7.46903	3.73591	JAMBI	0.271905	1
15	2021	JAMBI	7.67	0.315	3.7	42.8984	6929.89	1.39	108.85	8236.29	248.766	2074.22	8.84374	9.01643	5.52052	7.63782	3.75883	JAMBI	2.31925	1
15	2022	JAMBI	7.7	0.335	5.12	44.5146	9499.35	1.33	105.6	7373.44	143.123	2463.16	9.15908	8.90578	4.97067	7.8096	3.79582	JAMBI	3.76751	1
15	2023	JAMBI	7.58	0.343	4.66	46.0073	9633.96	1.33	100.48	7953.82	154.61	2615.39	9.17315	8.98153	5.04736	7.86955	3.8288	JAMBI	3.35335	1
16	2010	SUMATERA SELATAN	15.47	0.34		25.932	3413.32	1.85	69.71	5337.17	142.503	1427.8	8.13573	8.58264	4.96635	7.26459	3.25548	SUMATERA SELATAN		0
16	2011	SUMATERA SELATAN	14.24	0.401	6.36	27.158	6122.68	1.99452	77.3	6613.62	188.665	2038.02	8.71992	8.79704	5.24526	7.62022	3.30167	SUMATERA SELATAN	4.72767	0
16	2012	SUMATERA SELATAN	13.48	0.397	6.83	28.5779	10535.5	1.51336	78.6	7705.31	215.116	2342.35	9.26261	8.94979	5.37581	7.75934	3.35263	SUMATERA SELATAN	5.22833	0
16	2013	SUMATERA SELATAN	14.06	0.375	5.31	29.6568	9318.84	1.4908	80.89	9416.62	375.494	2485.91	9.1399	9.15034	5.9309	7.8188	3.38969	SUMATERA SELATAN	3.77519	0
16	2014	SUMATERA SELATAN	13.62	0.381	4.79	30.6363	20185.8	1.44335	76.64	9230.53	327.792	3198.04	9.91278	9.13038	5.79542	8.0706	3.42218	SUMATERA SELATAN	3.30282	0
16	2015	SUMATERA SELATAN	13.77	0.334	4.42	31.5493	19853.2	1.38504	72.18	4662.67	135.299	3262.7	9.89617	8.44756	4.91485	8.09062	3.45155	SUMATERA SELATAN	2.98023	0
16	2016	SUMATERA SELATAN	13.39	0.362	5.04	32.6995	46067.8	1.46	71.48	11416.7	381.503	3362.78	10.7379	9.34292	5.94674	8.12082	3.48736	SUMATERA SELATAN	3.64572	0
16	2017	SUMATERA SELATAN	13.1	0.365	5.51	34.0597	24226.6	1.44	81.31	13482.3	413.424	3998.67	10.0952	9.50921	6.02689	8.29397	3.52812	SUMATERA SELATAN	4.15973	0
16	2018	SUMATERA SELATAN	12.82	0.341	6.01	35.6598	25138.4	1.41	82.84	14194	372.228	4479.56	10.1322	9.56065	5.92219	8.4075	3.57402	SUMATERA SELATAN	4.69796	0
16	2019	SUMATERA SELATAN	12.56	0.339	5.69	37.1257	27159	1.39	61.65	15486	464.834	4722.41	10.2095	9.64775	6.14383	8.46029	3.61431	SUMATERA SELATAN	4.11087	0
16	2020	SUMATERA SELATAN	12.98	0.338	-0.11	37.3232	37600.9	1.25	53.45	15787.1	482.752	4613.36	10.5348	9.66701	6.18157	8.43693	3.61962	SUMATERA SELATAN	0.531949	1
16	2021	SUMATERA SELATAN	12.79	0.34	3.58	38.1822	34242.1	1.32	50.32	16502.9	462.172	5099.58	10.4412	9.71135	6.1381	8.53711	3.64237	SUMATERA SELATAN	2.30152	1
16	2022	SUMATERA SELATAN	11.95	0.33	5.23	39.7189	42816.2	1.27	56.64	15381	299.673	6485.76	10.6647	9.64096	5.70602	8.77752	3.68183	SUMATERA SELATAN	4.02459	1
16	2023	SUMATERA SELATAN	11.78	0.338	5.08	41.2775	48395.8	1.17	49.53	16539.8	321.069	6527.93	10.7872	9.71358	5.77477	8.784	3.72032	SUMATERA SELATAN	3.9241	1
17	2010	BENGKULU	18.3	0.365		16.4637	233.98	1.67	120.23	1983.23	87.7788	323.427	5.4595	7.59299	4.48615	5.78206	2.80116	BENGKULU		0
17	2011	BENGKULU	17.5	0.372	6.85	17.2823	390.43	2.18595	124.86	2288.85	127.536	378.968	5.96981	7.73624	4.85621	5.94009	2.84968	BENGKULU	4.9721	0
17	2012	BENGKULU	17.51	0.36	6.83	18.1435	346.91	1.7684	124.09	2615.74	127.713	427.557	5.85194	7.86969	4.85758	6.06042	2.89831	BENGKULU	4.98337	0
17	2013	BENGKULU	17.75	0.372	6.07	18.9193	381.71	1.68161	96.3	2743.51	158.258	468.751	5.94728	7.91736	5.07053	6.1522	2.94018	BENGKULU	4.27585	0
17	2014	BENGKULU	17.09	0.355	5.48	19.6267	248.11	1.70893	96.64	3344.42	181.814	589.884	5.51789	8.11535	5.20847	6.38162	2.97689	BENGKULU	3.73914	0
17	2015	BENGKULU	17.16	0.371	5.13	20.3025	837.79	1.62602	96.77	2750.77	130.207	623.556	6.73196	7.92	4.87678	6.43704	3.01074	BENGKULU	3.44306	0
17	2016	BENGKULU	17.03	0.354	5.28	21.0398	1698.01	1.69	99.98	4240.44	217.689	675.39	7.4378	8.35266	5.38765	6.51677	3.04642	BENGKULU	3.63187	0
17	2017	BENGKULU	15.59	0.349	4.98	21.7516	2175.01	1.67	103.09	4469.18	257.776	753.628	7.68525	8.40518	5.55596	6.62623	3.07969	BENGKULU	3.38311	0
17	2018	BENGKULU	15.41	0.355	4.97	22.4948	6881.04	1.65	100.42	4830.76	201.693	865.3	8.83667	8.48297	5.31169	6.76423	3.11329	BENGKULU	3.41675	0
17	2019	BENGKULU	14.91	0.329	4.94	23.5045	7471.56	1.63	96.52	5370.84	196.053	827.103	8.91899	8.58893	5.28348	6.71914	3.15719	BENGKULU	4.48854	0
17	2020	BENGKULU	15.3	0.323	-0.02	23.1059	8111.43	1.55	94.07	5478.01	178.37	739.462	9.00115	8.60868	5.18945	6.60727	3.14009	BENGKULU	-1.69589	1
17	2021	BENGKULU	14.43	0.321	3.27	23.5456	5261.87	1.48	93.89	5305.18	179.462	974.615	8.56843	8.57663	5.19552	6.88307	3.15894	BENGKULU	1.90306	1
17	2022	BENGKULU	14.34	0.315	4.31	24.2385	7777.72	1.4	90.73	4751.12	113.758	1122.27	8.95915	8.46634	4.74283	7.024	3.18794	BENGKULU	2.9425	1
17	2023	BENGKULU	14.04	0.333	4.26	24.9476	8391.72	1.35	87.96	5514.9	120.895	1111.32	9.03512	8.61539	4.80316	7.0142	3.21678	BENGKULU	2.92572	1
18	2010	LAMPUNG	18.94	0.36		19.7224	548.35	1.24	70.99	4201.65	116.777	1042.58	6.30874	8.34347	4.76879	6.95041	2.98175	LAMPUNG		0
18	2011	LAMPUNG	16.93	0.322	6.56	20.7393	1545.31	1.67709	75.57	6190.46	146.673	1411.91	7.34363	8.73093	4.995	7.2534	3.03203	LAMPUNG	5.15617	0
18	2012	LAMPUNG	15.65	0.356	6.44	21.7948	1409.71	1.27973	90.26	7055.79	221.566	1809.95	7.25185	8.86175	5.40523	7.50161	3.08167	LAMPUNG	5.08947	0
18	2013	LAMPUNG	14.39	0.356	5.77	22.7707	1895.34	1.23803	106.46	7113.01	248.823	1951.54	7.54768	8.86982	5.52075	7.57689	3.12547	LAMPUNG	4.47744	0
18	2014	LAMPUNG	14.21	0.331	5.08	23.6473	5442.43	1.18507	94.38	8006.94	253.09	2396.29	8.60216	8.98819	5.53769	7.7821	3.16325	LAMPUNG	3.84964	0
18	2015	LAMPUNG	13.53	0.352	5.13	24.5818	4657.63	1.13382	90.9	5297.23	127.402	2441.67	8.44648	8.57513	4.85516	7.80085	3.20201	LAMPUNG	3.95187	0
18	2016	LAMPUNG	13.86	0.358	5.14	25.5686	7183.36	1.21	82.68	10570.3	279.878	2627.62	8.87966	9.2659	5.63792	7.87422	3.24136	LAMPUNG	4.01431	0
18	2017	LAMPUNG	13.04	0.333	5.16	26.6149	8648.72	1.18	78.76	11313	350.32	3172.17	9.06528	9.33379	5.8617	8.06249	3.28147	LAMPUNG	4.09217	0
18	2018	LAMPUNG	13.01	0.326	5.23	27.7363	14230.4	1.16	85.99	12363.6	277.844	3389.86	9.56321	9.42259	5.63065	8.12884	3.32274	LAMPUNG	4.21336	0
18	2019	LAMPUNG	12.3	0.331	5.26	28.8945	4586.13	1.13	85.84	12961.1	284.882	3599.4	8.43101	9.46979	5.65558	8.1888	3.36365	LAMPUNG	4.17591	0
18	2020	LAMPUNG	12.76	0.32	-1.66	26.7466	14150.6	1.65	87.64	13723.3	317.644	3294.01	9.55758	9.52692	5.76407	8.10016	3.28641	LAMPUNG	-7.43346	1
18	2021	LAMPUNG	11.67	0.314	2.77	27.1496	12993.1	1.1	103.7	13795.3	353.165	3696.77	9.47225	9.53216	5.86976	8.21549	3.30136	LAMPUNG	1.50647	1
18	2022	LAMPUNG	11.44	0.313	4.28	27.9738	9707.78	1.07	108.23	12001.2	243.975	4280.26	9.18079	9.39285	5.50116	8.362	3.33127	LAMPUNG	3.03592	1
18	2023	LAMPUNG	11.11	0.324	4.55	28.9071	11025.9	1.22	106.81	13023.3	217.341	4286.83	9.30809	9.47457	5.38606	8.36353	3.36409	LAMPUNG	3.33637	1
19	2010	KEP. BANGKA BELITUNG	6.51	0.296		28.9068	197.84	3.14	78.13	1427.64	54.4884	353.104	5.2925	7.26448	4.01617	5.86959	3.36408	KEP. BANGKA BELITUNG		0
19	2011	KEP. BANGKA BELITUNG	5.75	0.32	6.9	30.2122	1838.78	2.83659	90.5	1615.36	81.4993	519.259	7.5174	7.38793	4.41279	6.25433	3.40825	KEP. BANGKA BELITUNG	4.5159	0
19	2012	KEP. BANGKA BELITUNG	5.37	0.311	5.5	31.1724	1105.76	2.30525	84.36	1772.51	94.8195	508.06	7.00919	7.48072	4.56247	6.23257	3.43953	KEP. BANGKA BELITUNG	3.17832	0
19	2013	KEP. BANGKA BELITUNG	5.25	0.307	5.2	32.0813	1978.16	2.1756	125.17	2255.46	116.863	630.693	7.59043	7.72155	4.76953	6.4484	3.46827	KEP. BANGKA BELITUNG	2.91565	0
19	2014	KEP. BANGKA BELITUNG	4.97	0.295	4.67	32.8596	1922.15	2.20532	121.57	2553.37	112.182	717.2	7.56172	7.84556	4.72899	6.57675	3.49225	KEP. BANGKA BELITUNG	2.42615	0
19	2015	KEP. BANGKA BELITUNG	4.83	0.275	4.08	33.4804	2164.08	2.15774	89.11	1195.04	44.3862	740.971	7.68021	7.08677	3.81521	6.60931	3.51096	KEP. BANGKA BELITUNG	1.88907	0
19	2016	KEP. BANGKA BELITUNG	5.04	0.288	4.1	34.1329	2910.54	2.2	75.9	3236.22	138.312	786.953	7.97644	8.08247	4.93672	6.66944	3.53026	KEP. BANGKA BELITUNG	1.94887	0
19	2017	KEP. BANGKA BELITUNG	5.3	0.276	4.47	34.9335	3809.01	2.18	92.27	3597.78	172.993	1026.76	8.24539	8.18835	5.15901	6.93514	3.55345	KEP. BANGKA BELITUNG	2.34569	0
19	2018	KEP. BANGKA BELITUNG	4.77	0.272	4.45	35.762	3783.06	2.16	97.14	3660.2	147.068	1200.7	8.23855	8.20555	4.99767	7.0915	3.57689	KEP. BANGKA BELITUNG	2.3717	0
19	2019	KEP. BANGKA BELITUNG	4.5	0.262	3.32	37.1731	4148.58	2.14	81.33	4062	166.753	1171.67	8.33076	8.30968	5.1225	7.06704	3.61559	KEP. BANGKA BELITUNG	3.9458	0
19	2020	KEP. BANGKA BELITUNG	4.89	0.257	-2.29	36.3076	2546.86	1.7	72.94	4363.35	180.447	977.815	7.84301	8.38123	5.20096	6.88634	3.59203	KEP. BANGKA BELITUNG	-2.32837	1
19	2021	KEP. BANGKA BELITUNG	4.67	0.247	5.05	37.6207	4315.55	1.6	108.01	4381.42	186.944	1216.04	8.37021	8.38536	5.23615	7.10418	3.62755	KEP. BANGKA BELITUNG	3.61654	1
19	2022	KEP. BANGKA BELITUNG	4.61	0.255	4.4	38.7438	8349.24	1.52	97.7	3905.53	108.166	1422.57	9.03005	8.2704	4.69287	7.26092	3.65697	KEP. BANGKA BELITUNG	2.98525	1
19	2023	KEP. BANGKA BELITUNG	4.52	0.245	4.38	39.9088	9078.32	1.39	75.65	4877.5	123.862	1318.07	9.11375	8.49259	4.82721	7.18468	3.6866	KEP. BANGKA BELITUNG	3.00714	1
21	2010	KEP. RIAU	8.05	0.293		65.7033	1656.49	4.95	265.57	1899.8	140.168	933.362	7.41306	7.55003	4.94995	6.83986	4.18515	KEP. RIAU		0
21	2011	KEP. RIAU	7.4	0.379	6.96	68.0242	3362.98	4.15674	263.89	2677.71	151.648	1186.8	8.12088	7.89309	5.02813	7.07985	4.21986	KEP. RIAU	3.53235	0
21	2012	KEP. RIAU	6.83	0.393	7.63	70.93	5237.33	3.20183	291.74	2505.15	170.447	1392.11	8.56376	7.8265	5.14428	7.2393	4.26169	KEP. RIAU	4.2717	0
21	2013	KEP. RIAU	6.35	0.38	7.21	73.7433	4266.1	3.10249	328.52	3429.36	211.179	1734.23	8.35869	8.14042	5.35743	7.45889	4.30059	KEP. RIAU	3.96635	0
21	2014	KEP. RIAU	6.4	0.437	6.6	76.3138	4906.36	3.00913	313.26	3966.38	230.057	2064.59	8.49849	8.28586	5.44267	7.63317	4.33485	KEP. RIAU	3.48571	0
21	2015	KEP. RIAU	5.78	0.339	6.02	78.6254	9446.67	2.92123	310.68	2369.47	148.344	2079.36	9.15352	7.77084	5.00625	7.6403	4.3647	KEP. RIAU	3.0291	0
21	2016	KEP. RIAU	5.84	0.352	4.98	80.2956	7466.84	3.06	310.39	3392.33	153.957	2158.64	8.91836	8.12957	5.04314	7.6777	4.38572	KEP. RIAU	2.12421	0
21	2017	KEP. RIAU	6.13	0.359	1.98	79.7437	15373.2	3.01	311.57	4257.84	192.191	2244.78	9.64045	8.35675	5.26368	7.71681	4.37882	KEP. RIAU	-0.68736	0
21	2018	KEP. RIAU	5.83	0.339	4.47	81.2062	16423.3	2.95	307.77	4390.86	210.007	2558.25	9.70652	8.38751	5.35189	7.84747	4.39699	KEP. RIAU	1.83403	0
21	2019	KEP. RIAU	5.8	0.337	4.83	81.1385	24608.6	2.9	268.57	4983.75	226.387	2832.33	10.1109	8.51414	5.42665	7.94921	4.39616	KEP. RIAU	-0.0833434	0
21	2020	KEP. RIAU	6.13	0.334	-3.8	85.0126	37513.3	2.02	266.06	5100.39	252.08	2227.57	10.5325	8.53727	5.53371	7.70911	4.4428	KEP. RIAU	4.77462	1
21	2021	KEP. RIAU	5.75	0.339	3.43	86.5846	24661	3.48	264.39	5677.7	221.239	2548.32	10.113	8.64448	5.40375	7.84358	4.46112	KEP. RIAU	1.8492	1
21	2022	KEP. RIAU	6.03	0.325	5.09	89.6374	19510.8	3.15	281.37	5051.91	159.65	3105.09	9.87878	8.52772	5.07923	8.04112	4.49577	KEP. RIAU	3.52572	1
21	2023	KEP. RIAU	5.69	0.34	5.2	92.9302	20635.5	1.53	260.15	5699.9	154.801	3421.5	9.93482	8.64838	5.04858	8.13813	4.53185	KEP. RIAU	3.67351	1
31	2010	DKI JAKARTA	3.48	0.361		111.529	62404.1	1.41	105.29	9387.87	311.606	10751.7	11.0414	9.14728	5.74494	9.28292	4.71428	DKI JAKARTA		0
31	2011	DKI JAKARTA	3.75	0.402	6.73	117.673	53001.2	1.50086	110.6	10837.3	464.885	15221.2	10.8781	9.29084	6.14394	9.63051	4.76791	DKI JAKARTA	5.50894	0
31	2012	DKI JAKARTA	3.7	0.437	6.53	123.962	48261.7	1.12797	105.53	13076.1	565.838	17721.5	10.7844	9.47862	6.34007	9.78259	4.81998	DKI JAKARTA	5.34487	0
31	2013	DKI JAKARTA	3.72	0.404	6.07	130.06	37334.5	1.09511	103.78	16018.8	749.766	23370.2	10.5277	9.68158	6.62109	10.0593	4.868	DKI JAKARTA	4.91918	0
31	2014	DKI JAKARTA	4.09	0.436	5.91	136.312	73907.9	1.05316	100.34	15808.9	739.942	27050.9	11.2106	9.66839	6.60792	10.2055	4.91495	DKI JAKARTA	4.80702	0
31	2015	DKI JAKARTA	3.61	0.421	5.91	142.914	65442.2	1.02233	96.59	16842.3	745.934	29076.9	11.0889	9.73171	6.61598	10.2777	4.96224	DKI JAKARTA	4.84275	0
31	2016	DKI JAKARTA	3.75	0.397	5.87	149.832	57875.4	1.07	95.02	18927.2	751.927	31613.2	10.9661	9.84841	6.62397	10.3614	5.00951	DKI JAKARTA	4.84089	0
31	2017	DKI JAKARTA	3.78	0.409	6.2	157.637	109515	1.05	114.63	21574.1	714.127	36500.8	11.6038	9.97929	6.57246	10.5051	5.06029	DKI JAKARTA	5.20897	0
31	2018	DKI JAKARTA	3.55	0.39	6.11	165.769	119442	1.03	141.87	24808.7	1895.02	37538.9	11.6906	10.119	7.54751	10.5332	5.1106	DKI JAKARTA	5.15895	0
31	2019	DKI JAKARTA	3.42	0.391	5.82	174.813	119409	1.02	126.9	30672.9	1462.65	40298.1	11.6903	10.3312	7.28869	10.6041	5.16371	DKI JAKARTA	5.4555	0
31	2020	DKI JAKARTA	4.69	0.4	-2.39	170.089	93919.8	0.92	119.36	23999.2	1078.53	31895.3	11.4502	10.0858	6.98428	10.3702	5.13632	DKI JAKARTA	-2.70203	1
31	2021	DKI JAKARTA	4.67	0.411	3.55	175.005	102232	0.6	129.38	28024	3897.5	34575.6	11.535	10.2409	8.26835	10.4509	5.16481	DKI JAKARTA	2.89003	1
31	2022	DKI JAKARTA	4.61	0.412	5.25	183.598	148122	0.64	139.24	25844.6	1669.17	40275.1	11.9058	10.1599	7.42068	10.6035	5.21275	DKI JAKARTA	4.91063	1
31	2023	DKI JAKARTA	4.44	0.431	4.96	192.133	169662	0.38	143.52	31008.9	1877.75	43600	12.0416	10.3421	7.53836	10.6828	5.25819	DKI JAKARTA	4.64865	1
32	2010	JAWA BARAT	11.27	0.356		20.9749	31012.7	1.9	90.47	18307.8	474.118	7823.59	10.3422	9.81514	6.16356	8.96503	3.04333	JAWA BARAT		0
32	2011	JAWA BARAT	10.65	0.38	6.5	21.9765	46009.6	2.05627	90.19	25961.7	611.882	10988.2	10.7366	10.1644	6.41817	9.30467	3.08998	JAWA BARAT	4.77517	0
32	2012	JAWA BARAT	9.89	0.422	6.5	23.036	52101.5	1.6045	99.98	30701.8	806.227	13864.5	10.861	10.3321	6.6936	9.53716	3.13706	JAWA BARAT	4.82092	0
32	2013	JAWA BARAT	9.61	0.406	6.33	24.1183	95851.3	1.56124	69.61	32914.3	1047.45	17575.9	11.4706	10.4017	6.95507	9.77434	3.18297	JAWA BARAT	4.69834	0
32	2014	JAWA BARAT	9.18	0.398	5.09	24.9669	100358	1.5196	72.51	38013.1	1077.36	21523.4	11.5165	10.5457	6.98319	9.97694	3.21755	JAWA BARAT	3.51828	0
32	2015	JAWA BARAT	9.57	0.426	5.05	25.8455	105438	1.4773	74.11	42665.4	365.186	23675.8	11.5659	10.6612	5.90314	10.0723	3.25214	JAWA BARAT	3.51923	0
32	2016	JAWA BARAT	8.77	0.402	5.66	26.9235	103867	1.54	74.38	47317.8	1026.27	25797.6	11.5509	10.7647	6.93466	10.1581	3.293	JAWA BARAT	4.17098	0
32	2017	JAWA BARAT	7.83	0.393	5.33	27.9709	108067	1.52	82.83	49536.5	1219.2	28559.9	11.5905	10.8105	7.10677	10.2598	3.33117	JAWA BARAT	3.89032	0
32	2018	JAWA BARAT	7.25	0.405	5.65	29.1601	122988	1.5	88.29	57189.4	1161.01	30915.3	11.7199	10.9541	7.05791	10.339	3.3728	JAWA BARAT	4.25134	0
32	2019	JAWA BARAT	6.82	0.398	5.02	30.4134	131037	1.48	88.91	62227.4	1334.45	33954.6	11.7832	11.0386	7.19702	10.4328	3.41488	JAWA BARAT	4.29804	0
32	2020	JAWA BARAT	8.43	0.398	-2.52	30.1805	119016	1.11	85.11	63062	1135.86	29637	11.687	11.0519	7.03602	10.2968	3.4072	JAWA BARAT	-0.765551	1
32	2021	JAWA BARAT	7.97	0.406	3.74	30.9352	134400	1.41	96.7	68469.1	1561.27	33158.7	11.8086	11.1342	7.3539	10.4091	3.4319	JAWA BARAT	2.50058	1
32	2022	JAWA BARAT	7.98	0.412	5.45	32.2468	183602	1.33	99.73	57151.3	831.318	38052.8	12.1205	10.9535	6.72421	10.5468	3.47342	JAWA BARAT	4.23966	1
32	2023	JAWA BARAT	7.62	0.425	5	33.4819	215715	1.18	107.26	61201.6	860.353	39918.1	12.2817	11.0219	6.7585	10.5946	3.511	JAWA BARAT	3.83012	1
33	2010	JAWA TENGAH	16.56	0.341		19.2093	1327.01	0.37	58.56	18620.2	504.745	5992.65	7.19144	9.83205	6.22603	8.69846	2.95539	JAWA TENGAH		0
33	2011	JAWA TENGAH	15.76	0.357	5.3	20.0538	4324.41	1.05705	61.73	22875.4	541.043	5828.73	8.37226	10.0379	6.29535	8.67073	2.99842	JAWA TENGAH	4.39625	0
33	2012	JAWA TENGAH	14.98	0.372	5.34	20.9506	8132.54	0.83728	66.07	25662.3	647.639	7259.63	9.00375	10.1528	6.47488	8.89022	3.04217	JAWA TENGAH	4.47207	0
33	2013	JAWA TENGAH	14.44	0.39	5.11	21.8449	18253	0.803055	81.84	26212	838.438	9061.73	9.81214	10.174	6.73273	9.11193	3.08397	JAWA TENGAH	4.26837	0
33	2014	JAWA TENGAH	13.58	0.388	5.27	22.8192	19365.8	0.77862	83.77	32763.1	911.514	10978.5	9.87132	10.3971	6.8162	9.30378	3.1276	JAWA TENGAH	4.46004	0
33	2015	JAWA TENGAH	13.32	0.382	5.47	23.8871	27142	0.74874	79.24	20727.8	589.704	12186.8	10.2089	9.93928	6.38131	9.40819	3.17334	JAWA TENGAH	4.67984	0
33	2016	JAWA TENGAH	13.19	0.357	5.25	24.9595	37920.1	0.79	76.72	42428.1	953.677	13267.5	10.5433	10.6556	6.86137	9.49315	3.21725	JAWA TENGAH	4.48959	0
33	2017	JAWA TENGAH	12.23	0.365	5.26	26.0889	52008.9	0.78	81.36	47024.1	1092.96	15003.4	10.8592	10.7584	6.99756	9.6161	3.26151	JAWA TENGAH	4.52501	0
33	2018	JAWA TENGAH	11.19	0.357	5.3	27.2853	61834	0.77	88.09	43611.6	872.981	16464	11.0322	10.6831	6.77306	9.70899	3.30635	JAWA TENGAH	4.58563	0
33	2019	JAWA TENGAH	10.58	0.358	5.36	28.6959	56510.4	0.76	87.79	47579.8	932.97	17592.4	10.9422	10.7702	6.83944	9.77528	3.35676	JAWA TENGAH	5.17008	0
33	2020	JAWA TENGAH	11.84	0.359	-2.65	26.4837	49840.2	1.17	74.08	47781.6	973.668	16380.1	10.8166	10.7744	6.8821	9.70389	3.27653	JAWA TENGAH	-7.70925	1
33	2021	JAWA TENGAH	11.25	0.368	3.33	27.0929	52228.7	0.83	81.11	55820.8	1077.66	17391.4	10.8634	10.9299	6.98347	9.76379	3.29927	JAWA TENGAH	2.3004	1
33	2022	JAWA TENGAH	10.98	0.366	5.31	28.2482	62149.5	0.81	80.37	51419.4	1036.54	20533	11.0373	10.8478	6.94461	9.92984	3.34103	JAWA TENGAH	4.26403	1
33	2023	JAWA TENGAH	10.77	0.369	4.98	29.3696	57092.6	1.01	74.15	56324.7	972.763	22870.4	10.9524	10.9389	6.88117	10.0376	3.37996	JAWA TENGAH	3.96996	1
34	2010	DI YOGYAKARTA	16.83	0.407		18.653	54.51	1.04	74.38	2862.02	88.1088	820.377	4.01656	7.95963	4.48986	6.71098	2.92601	DI YOGYAKARTA		0
34	2011	DI YOGYAKARTA	16.08	0.423	5.21	19.3875	23.42	1.51844	77.45	3329.04	93.1783	1047.43	3.1954	8.11074	4.54519	6.95505	2.96463	DI YOGYAKARTA	3.9376	0
34	2012	DI YOGYAKARTA	15.88	0.449	5.37	20.1839	1155.35	1.22507	79.6	3819.78	113.068	1328.12	7.05302	8.24821	4.7368	7.19227	3.00488	DI YOGYAKARTA	4.10797	0
34	2013	DI YOGYAKARTA	15.03	0.416	5.47	21.0377	644.36	1.1821	121.24	3654.16	138.74	1669.97	6.46981	8.20389	4.93978	7.42116	3.04632	DI YOGYAKARTA	4.23021	0
34	2014	DI YOGYAKARTA	14.55	0.435	5.17	21.8679	1511.14	1.16829	131.37	4170.88	151.932	2020.37	7.32128	8.33612	5.02999	7.61153	3.08502	DI YOGYAKARTA	3.94625	0
34	2015	DI YOGYAKARTA	13.16	0.42	4.95	22.6884	1591.58	1.1548	134.69	1803.54	90.004	2259.94	7.37311	7.49806	4.5109	7.72354	3.12185	DI YOGYAKARTA	3.75189	0
34	2016	DI YOGYAKARTA	13.1	0.425	5.05	23.5657	1212.56	1.18	136.58	5786.39	162.116	2384.72	7.10131	8.66344	5.09446	7.77726	3.15979	DI YOGYAKARTA	3.86683	0
34	2017	DI YOGYAKARTA	12.36	0.44	5.26	24.5338	788.88	1.17	137.88	5486.83	177.589	2794.85	6.67188	8.61029	5.18509	7.93589	3.20005	DI YOGYAKARTA	4.10818	0
34	2018	DI YOGYAKARTA	11.81	0.422	6.2	25.7763	7309.63	1.16	132.53	6240.11	153.854	3014.26	8.89709	8.73891	5.04248	8.01144	3.24946	DI YOGYAKARTA	5.06448	0
34	2019	DI YOGYAKARTA	11.44	0.428	6.59	27.0087	6502.21	1.15	130.22	6513.97	177.359	3211.46	8.78005	8.78186	5.1838	8.07479	3.29616	DI YOGYAKARTA	4.78102	0
34	2020	DI YOGYAKARTA	12.8	0.437	-2.67	27.7545	2820.51	0.58	130.55	6863.08	154.561	2823.94	7.94503	8.83406	5.04704	7.94624	3.3234	DI YOGYAKARTA	2.7613	1
34	2021	DI YOGYAKARTA	11.91	0.436	5.58	29.1159	3072.53	1.61	126.95	8141.39	292.043	2932	8.03058	9.00484	5.68032	7.98378	3.37128	DI YOGYAKARTA	4.90512	1
34	2022	DI YOGYAKARTA	11.49	0.459	5.15	30.4106	4066.65	1.44	121.9	7436.32	254.111	3632.81	8.31082	8.91427	5.5417	8.19804	3.41479	DI YOGYAKARTA	4.44675	1
34	2023	DI YOGYAKARTA	11.04	0.449	5.07	31.7482	5724.75	0.67	115.09	8245.66	240.346	3579.31	8.65273	9.01756	5.48623	8.1832	3.45784	DI YOGYAKARTA	4.3986	1
35	2010	JAWA TIMUR	15.26	0.337		26.3711	23991.2	0.76	71.61	21155.7	577.6	7239.18	10.0855	9.95971	6.36061	8.8874	3.27227	JAWA TIMUR		0
35	2011	JAWA TIMUR	14.23	0.351	6.44	27.8643	21585.1	0.971801	76.92	25435.5	623.295	10119	9.9798	10.1439	6.43662	9.22227	3.32734	JAWA TIMUR	5.66211	0
35	2012	JAWA TIMUR	13.08	0.362	6.64	29.5084	43749.4	0.702941	77.02	29748.4	786.458	11450.6	10.6863	10.3006	6.66881	9.34588	3.38468	JAWA TIMUR	5.90053	0
35	2013	JAWA TIMUR	12.73	0.368	6.08	31.092	76245.9	0.671793	80.65	31793.5	1039.47	14025.1	11.2417	10.367	6.94743	9.54867	3.43695	JAWA TIMUR	5.36674	0
35	2014	JAWA TIMUR	12.28	0.403	5.86	32.7034	60555.1	0.64385	87.51	38035.9	1129.42	17240	11.0113	10.5463	7.03035	9.75505	3.48748	JAWA TIMUR	5.18252	0
35	2015	JAWA TIMUR	12.28	0.403	5.44	34.2718	71265.4	0.616421	79.91	28543.5	761.095	19028.5	11.1742	10.2592	6.63607	9.85375	3.53432	JAWA TIMUR	4.79589	0
35	2016	JAWA TIMUR	11.85	0.402	5.57	35.9708	72411.3	0.66	82.9	51419.1	1188.78	19872.2	11.1901	10.8478	7.08152	9.89713	3.58271	JAWA TIMUR	4.95734	0
35	2017	JAWA TIMUR	11.2	0.415	5.46	37.7243	66269.6	0.64	89.93	52963.7	1599.78	23077.8	11.1015	10.8774	7.37825	10.0467	3.6303	JAWA TIMUR	4.87482	0
35	2018	JAWA TIMUR	10.85	0.371	5.47	39.5799	52641.8	0.63	97.96	53741.3	1412.44	24425.3	10.8713	10.892	7.25378	10.1034	3.67832	JAWA TIMUR	4.91901	0
35	2019	JAWA TIMUR	10.2	0.364	5.53	41.5122	57494.9	0.62	93.75	58532.4	1673.31	25484.5	10.9595	10.9774	7.42316	10.1459	3.72599	JAWA TIMUR	4.88189	0
35	2020	JAWA TIMUR	11.46	0.364	-2.33	39.6862	77882.4	0.79	92.85	58076.6	1322.35	23263.3	11.263	10.9695	7.18792	10.0547	3.681	JAWA TIMUR	-4.39873	1
35	2021	JAWA TIMUR	10.59	0.364	3.56	40.7798	78938.1	0.7	97.84	65264	1677.43	25257.9	11.2764	11.0862	7.42562	10.1369	3.70819	JAWA TIMUR	2.75569	1
35	2022	JAWA TIMUR	10.49	0.365	5.34	42.6358	114658	0.68	94.62	57797	1534.64	28999.8	11.6497	10.9647	7.3367	10.2751	3.7527	JAWA TIMUR	4.55134	1
35	2023	JAWA TIMUR	10.35	0.387	4.95	44.4233	148024	0.77	84.68	65715.3	1832.55	29058.4	11.9051	11.0931	7.51401	10.2771	3.79376	JAWA TIMUR	4.19241	1
36	2010	BANTEN	7.16	0.419		25.3977	19736.3	2.78	166.26	4210.42	122.691	2724.45	9.89027	8.34556	4.81779	7.91039	3.23466	BANTEN		0
36	2011	BANTEN	6.32	0.394	7.03	26.5489	23991.5	2.9326	165.84	5444.88	170.294	4306.73	10.0855	8.60262	5.14338	8.36817	3.27899	BANTEN	4.53306	0
36	2012	BANTEN	5.71	0.384	6.83	27.7165	31383.8	2.33004	167.41	6614.46	217.02	5141.26	10.3541	8.79716	5.38459	8.54525	3.32203	BANTEN	4.39765	0
36	2013	BANTEN	5.89	0.38	6.67	28.9107	49354.5	2.26806	160.11	7735.94	306.435	6492.23	10.8068	8.95376	5.72826	8.77851	3.36421	BANTEN	4.30859	0
36	2014	BANTEN	5.51	0.424	5.51	29.8466	33392.1	2.2003	155.63	9069.37	440.334	8222.9	10.4161	9.11277	6.0898	9.0148	3.39607	BANTEN	3.23749	0
36	2015	BANTEN	5.75	0.386	5.45	30.813	45776.3	2.13584	142.8	5967.86	235.566	8926.15	10.7315	8.69431	5.46623	9.09685	3.42794	BANTEN	3.23785	0
36	2016	BANTEN	5.36	0.392	5.28	31.7816	51552.8	2.23	132.91	12085.3	374.284	9792.91	10.8504	9.39982	5.92768	9.18952	3.45889	BANTEN	3.14325	0
36	2017	BANTEN	5.59	0.379	5.75	32.9476	56429	2.2	137.9	13695	436.91	11282.7	10.9408	9.52486	6.08201	9.33112	3.49492	BANTEN	3.66892	0
36	2018	BANTEN	5.25	0.367	5.77	34.1838	59579.3	2.17	135.27	14671.4	383.644	11993.3	10.9951	9.59372	5.95232	9.39218	3.53175	BANTEN	3.75187	0
36	2019	BANTEN	4.94	0.361	5.26	35.9139	46677.9	2.14	125.96	16542.1	406.743	13407.8	10.751	9.71372	6.01064	9.50367	3.58112	BANTEN	5.06132	0
36	2020	BANTEN	6.63	0.365	-3.39	37.1652	61380.6	1.1	146.18	15779.4	299.473	11309.6	11.0249	9.66652	5.70536	9.33349	3.61537	BANTEN	3.48405	1
36	2021	BANTEN	6.5	0.363	4.49	38.3394	57238.1	1.76	185.42	16854.5	475.019	13010.5	10.955	9.73243	6.16546	9.47359	3.64648	BANTEN	3.15957	1
36	2022	BANTEN	6.24	0.377	5.03	39.7904	84937.3	1.66	203.1	16284.4	385.018	15738.1	11.3497	9.69803	5.95588	9.6639	3.68363	BANTEN	3.78454	1
36	2023	BANTEN	6.17	0.368	4.81	41.2283	106597	1.22	198.49	18078.2	376.879	16039.6	11.5768	9.80252	5.93457	9.68288	3.71913	BANTEN	3.61379	1
51	2010	BALI	4.88	0.366		23.9926	2815.54	2.15	127.36	3318.66	138.217	2447.22	7.94326	8.10762	4.93603	7.80312	3.17775	BALI		0
51	2011	BALI	4.2	0.387	6.66	25.266	4684.97	1.72715	135.33	4685.67	260.548	3402.12	8.45233	8.45248	5.56662	8.13245	3.22946	BALI	5.30717	0
51	2012	BALI	3.95	0.397	6.96	26.6896	7769.26	1.238	141.85	5281.88	232.027	4238.53	8.95806	8.57223	5.45115	8.35221	3.28427	BALI	5.63454	0
51	2013	BALI	4.49	0.44	6.69	28.1297	7748.81	1.22286	133.21	5808.48	261.009	5225.66	8.95542	8.66725	5.56838	8.56153	3.33682	BALI	5.3957	0
51	2014	BALI	4.76	0.442	6.73	29.6689	5566.71	1.20809	131.28	6448.03	240.457	6023.85	8.62474	8.77168	5.48669	8.70365	3.3901	BALI	5.47191	0
51	2015	BALI	5.25	0.399	6.03	31.0936	8090.56	1.16931	123.18	3650.68	110.681	6462.21	8.99858	8.20294	4.71565	8.77388	3.437	BALI	4.80203	0
51	2016	BALI	4.15	0.374	6.33	32.6891	6537.03	1.21	129.13	13215.1	1705.32	6927.4	8.78539	9.48919	7.4421	8.84338	3.48704	BALI	5.13122	0
51	2017	BALI	4.14	0.379	5.56	34.1298	12607.6	1.2	121.33	10403.1	325.01	8001.72	9.44214	9.24995	5.78693	8.98754	3.53017	BALI	4.40743	0
51	2018	BALI	3.91	0.364	6.31	35.8963	16065.5	1.18	107.78	10459.5	278.609	8846.2	9.68449	9.25537	5.63339	9.08786	3.58064	BALI	5.17585	0
51	2019	BALI	3.61	0.37	5.6	37.2975	13315.3	1.17	92.75	10888.3	281.819	9743.45	9.49675	9.29554	5.64481	9.18445	3.61893	BALI	3.90332	0
51	2020	BALI	4.45	0.369	-9.34	34.2165	9569	1.01	35.36	9849.92	195.353	5413.67	9.16639	9.19532	5.27991	8.59687	3.53271	BALI	-8.26055	1
51	2021	BALI	4.72	0.375	-2.46	33.1238	12804.4	1.4	16.97	11208.3	256.473	4971.1	9.45762	9.3245	5.55092	8.5116	3.50025	BALI	-3.19357	1
51	2022	BALI	4.53	0.362	4.84	34.481	13073.8	1.29	63.11	11017.8	155.114	8398.45	9.47844	9.30736	5.05059	9.03592	3.54041	BALI	4.09733	1
51	2023	BALI	4.25	0.362	5.71	36.203	19414.4	0.73	95.88	12681.3	178.853	9862.51	9.87382	9.44796	5.19214	9.1966	3.58914	BALI	4.99417	1
52	2010	NUSA TENGGARA BARAT	21.55	0.396		15.5274	3788.63	1.17	98.46	2845.03	120.603	474.16	8.24002	7.95368	4.80076	6.16365	2.74261	NUSA TENGGARA BARAT		0
52	2011	NUSA TENGGARA BARAT	19.73	0.366	-3.91	14.7058	4259.63	1.8177	76.67	3890.97	129.677	651.825	8.35717	8.26667	4.87273	6.48131	2.68824	NUSA TENGGARA BARAT	-5.29155	0
52	2012	NUSA TENGGARA BARAT	18.02	0.354	-1.54	14.2767	6193.5	1.41859	80.29	3678.56	152.282	758.702	8.73142	8.21055	5.03228	6.63293	2.65863	NUSA TENGGARA BARAT	-2.91777	0
52	2013	NUSA TENGGARA BARAT	17.25	0.349	5.16	14.8098	7348.24	1.37723	75.53	4505.59	194.955	949.623	8.90235	8.4133	5.27789	6.85712	2.69529	NUSA TENGGARA BARAT	3.73441	0
52	2014	NUSA TENGGARA BARAT	17.05	0.391	5.17	15.3699	7068.6	1.3373	77.34	5071.2	213.167	1244.49	8.86356	8.53153	5.36676	7.12728	2.73241	NUSA TENGGARA BARAT	3.78194	0
52	2015	NUSA TENGGARA BARAT	16.54	0.36	21.76	18.4751	9995.75	1.2987	76.55	929.728	24.1964	1379.31	9.21002	6.83597	3.2267	7.23006	2.91643	NUSA TENGGARA BARAT	20.2031	0
52	2016	NUSA TENGGARA BARAT	16.02	0.365	5.81	19.3058	7241.4	1.36	75.48	7748.85	318.078	1462.92	8.88771	8.95543	5.76543	7.28887	2.96041	NUSA TENGGARA BARAT	4.49604	0
52	2017	NUSA TENGGARA BARAT	15.05	0.378	0.09	19.0913	7202.52	1.34	70.81	7829.45	298.244	1740.98	8.88233	8.96578	5.70126	7.46278	2.94923	NUSA TENGGARA BARAT	-1.11122	0
52	2018	NUSA TENGGARA BARAT	14.63	0.391	-4.5	18.0205	7777.74	1.32	73.3	9202.18	291.734	1805.81	8.95915	9.12731	5.67926	7.49932	2.89151	NUSA TENGGARA BARAT	-5.60864	0
52	2019	NUSA TENGGARA BARAT	13.88	0.374	3.9	18.2191	7282.31	1.29	84.02	10178.4	296.992	2004.86	8.89334	9.22812	5.69707	7.60383	2.90247	NUSA TENGGARA BARAT	1.10213	0
52	2020	NUSA TENGGARA BARAT	14.23	0.386	-0.62	17.5831	10843.2	1.63	89.63	10023	267.774	1792.2	9.29138	9.21274	5.59387	7.49176	2.86694	NUSA TENGGARA BARAT	-3.49084	1
52	2021	NUSA TENGGARA BARAT	13.83	0.384	2.3	17.7158	12574.5	1.76	96.55	10608.1	349.325	1973.71	9.43951	9.26947	5.85886	7.58818	2.87446	NUSA TENGGARA BARAT	0.754872	1
52	2022	NUSA TENGGARA BARAT	13.82	0.374	6.95	18.6471	22114.9	1.64	116.6	9364.4	266.405	2401.15	10.0041	9.14478	5.58876	7.78412	2.92569	NUSA TENGGARA BARAT	5.25665	1
52	2023	NUSA TENGGARA BARAT	13.85	0.375	1.8	18.6872	37987.8	1.62	105.7	11211.9	259.217	2899.2	10.545	9.32482	5.56152	7.97253	2.92784	NUSA TENGGARA BARAT	0.214779	1
53	2010	NUSA TENGGARA TIMUR	23.03	0.378		9.31679	34.53	2.07	55.84	3646.14	176.138	256.875	3.57038	8.2017	5.17693	5.55248	2.23182	NUSA TENGGARA TIMUR		0
53	2011	NUSA TENGGARA TIMUR	21.23	0.33	5.67	9.67589	50.8	2.24604	66.55	4514.24	187.978	352.804	3.94739	8.41521	5.24163	5.86874	2.26964	NUSA TENGGARA TIMUR	3.85433	0
53	2012	NUSA TENGGARA TIMUR	20.41	0.358	5.46	10.031	98.75	1.71226	75.67	5539.31	254.823	431.84	4.60267	8.61981	5.54449	6.07037	2.30568	NUSA TENGGARA TIMUR	3.66984	0
53	2013	NUSA TENGGARA TIMUR	20.24	0.344	5.41	10.3968	137.65	1.70396	74.63	5730.22	285.96	518.361	4.93195	8.65368	5.65934	6.2526	2.34149	NUSA TENGGARA TIMUR	3.6465	0
53	2014	NUSA TENGGARA TIMUR	19.6	0.355	5.05	10.7423	191.11	1.67541	66.49	6562.7	298.19	763.014	5.25807	8.78931	5.70108	6.63859	2.37419	NUSA TENGGARA TIMUR	3.32373	0
53	2015	NUSA TENGGARA TIMUR	22.58	0.348	4.92	11.0879	2259.3	1.64781	87.48	3048.07	171.606	929.6	7.72325	8.02259	5.15101	6.83583	2.40586	NUSA TENGGARA TIMUR	3.21709	0
53	2016	NUSA TENGGARA TIMUR	22.01	0.362	5.12	11.4688	1604.75	1.69	73.45	9518.45	485.893	1087.84	7.38135	9.16109	6.18804	6.99287	2.43963	NUSA TENGGARA TIMUR	3.43509	0
53	2017	NUSA TENGGARA TIMUR	21.38	0.359	5.11	11.8634	2964.94	1.68	72.57	10849.2	419.592	1168.21	7.99495	9.29194	6.04166	7.06408	2.47346	NUSA TENGGARA TIMUR	3.44082	0
53	2018	NUSA TENGGARA TIMUR	21.03	0.359	5.11	12.2738	5699.5	1.67	75.41	11608.6	327.416	1268.59	8.64831	9.35959	5.79428	7.14645	2.50747	NUSA TENGGARA TIMUR	3.45971	0
53	2019	NUSA TENGGARA TIMUR	20.62	0.355	5.25	12.762	5515.66	1.66	71.73	12632.3	326.659	1397.79	8.61553	9.44409	5.79197	7.24337	2.54647	NUSA TENGGARA TIMUR	3.97699	0
53	2020	NUSA TENGGARA TIMUR	21.21	0.356	-0.84	12.961	4174.61	1.25	57.93	13258.5	322.264	1301.11	8.33702	9.49247	5.77847	7.17174	2.56194	NUSA TENGGARA TIMUR	1.55908	1
53	2021	NUSA TENGGARA TIMUR	20.44	0.339	2.52	13.0767	4870.47	1.56	55.06	12794.2	374.349	1329.4	8.49115	9.45682	5.92786	7.19323	2.57083	NUSA TENGGARA TIMUR	0.892913	1
53	2022	NUSA TENGGARA TIMUR	20.23	0.34	3.05	13.2612	4612.72	1.5	52.15	11668.8	243.813	1646.4	8.43679	9.36476	5.50049	7.40695	2.58484	NUSA TENGGARA TIMUR	1.41129	1
53	2023	NUSA TENGGARA TIMUR	19.96	0.325	3.52	13.5135	5323.24	1.64	52.08	14231.3	219.485	2256.95	8.58003	9.56327	5.39583	7.72221	2.60369	NUSA TENGGARA TIMUR	1.90224	1
61	2010	KALIMANTAN BARAT	9.02	0.37		19.5101	2704.18	0.91	28.83	3671.91	141.341	717.777	7.90292	8.20874	4.95822	6.57755	2.97093	KALIMANTAN BARAT		0
61	2011	KALIMANTAN BARAT	8.6	0.363	5.5	20.2272	5944.33	2.11556	46.04	4746.38	158.752	1147.25	8.69036	8.46535	5.07363	7.04599	3.00703	KALIMANTAN BARAT	3.67549	0
61	2012	KALIMANTAN BARAT	7.96	0.395	5.91	21.0622	6655.16	1.7153	33.74	5219.94	172.647	1347.76	8.8033	8.56043	5.15702	7.20694	3.04748	KALIMANTAN BARAT	4.12841	0
61	2013	KALIMANTAN BARAT	8.74	0.384	6.05	21.9719	10444.4	1.64258	36.54	5918.33	239.354	1591.82	9.25392	8.68598	5.48211	7.37326	3.08977	KALIMANTAN BARAT	4.31916	0
61	2014	KALIMANTAN BARAT	8.07	0.402	5.03	22.7127	16339.2	1.61603	25.06	6035.24	241.457	1907.14	9.70139	8.70554	5.49082	7.55388	3.12292	KALIMANTAN BARAT	3.37121	0
61	2015	KALIMANTAN BARAT	8.44	0.33	4.88	23.4565	24569.8	1.56913	19.84	4075.8	149.672	1971.73	10.1093	8.31307	5.01511	7.58717	3.15515	KALIMANTAN BARAT	3.27514	0
61	2016	KALIMANTAN BARAT	8	0.331	5.2	24.3088	17489.8	1.63	16.34	8351.73	267.588	2006.6	9.76943	9.03034	5.59318	7.60469	3.19084	KALIMANTAN BARAT	3.63366	0
61	2017	KALIMANTAN BARAT	7.86	0.329	5.17	25.198	20082.2	1.61	17.11	9805.75	257.854	2431.18	9.90764	9.19083	5.55626	7.79654	3.22676	KALIMANTAN BARAT	3.65776	0
61	2018	KALIMANTAN BARAT	7.37	0.325	5.07	26.1106	13715.1	1.58	20.18	9878.2	250.814	2875.51	9.52633	9.19819	5.52869	7.96433	3.26234	KALIMANTAN BARAT	3.62156	0
61	2019	KALIMANTAN BARAT	7.28	0.318	5.09	27.1998	15098.9	1.56	20.81	11185.8	262.061	2863.6	9.62245	9.32249	5.57238	7.96019	3.30321	KALIMANTAN BARAT	4.17153	0
61	2020	KALIMANTAN BARAT	7.24	0.325	-1.82	24.9536	19965.9	2.04	20.99	11568.3	263.612	2588.82	9.90183	9.35611	5.57826	7.85934	3.21702	KALIMANTAN BARAT	-8.25805	1
61	2021	KALIMANTAN BARAT	6.84	0.315	4.8	25.7935	17385.8	1.39	21.32	11564.6	437.543	2987.61	9.76347	9.35579	6.08346	8.00256	3.25012	KALIMANTAN BARAT	3.36585	1
61	2022	KALIMANTAN BARAT	6.81	0.311	5.07	26.7346	21109.9	1.33	24.84	10979.8	187.931	3668.97	9.95754	9.30391	5.24138	8.20794	3.28596	KALIMANTAN BARAT	3.64844	1
61	2023	KALIMANTAN BARAT	6.71	0.321	4.46	27.5603	22453	1.39	22.08	12066.9	178.073	3758.11	10.0192	9.39831	5.18779	8.23194	3.31638	KALIMANTAN BARAT	3.08877	1
62	2010	KALIMANTAN TENGAH	6.77	0.304		25.455	8422.15	1.79	89.68	2891.94	133.978	457.872	9.03874	7.97003	4.90511	6.12877	3.23691	KALIMANTAN TENGAH		0
62	2011	KALIMANTAN TENGAH	6.56	0.334	7.01	26.5889	8305.87	2.84345	88.64	3557.55	171.798	803.491	9.02484	8.17711	5.15212	6.69021	3.28049	KALIMANTAN TENGAH	4.45432	0
62	2012	KALIMANTAN TENGAH	6.19	0.332	6.87	27.749	9603.85	2.41758	88.48	3890.07	188.451	943.649	9.17002	8.26644	5.24413	6.85081	3.3232	KALIMANTAN TENGAH	4.36314	0
62	2013	KALIMANTAN TENGAH	6.23	0.358	7.37	29.1064	7705.06	2.36052	89.92	4866.82	267.411	1110.67	8.94976	8.4904	5.59252	7.01362	3.37096	KALIMANTAN TENGAH	4.89167	0
62	2014	KALIMANTAN TENGAH	6.07	0.365	6.21	30.2167	12811.4	2.30608	90.18	5268.63	271.14	1324.2	9.45817	8.56971	5.60632	7.18932	3.4084	KALIMANTAN TENGAH	3.81473	0
62	2015	KALIMANTAN TENGAH	5.91	0.3	7.01	31.6192	14148.7	2.2541	92.58	2973.65	150.874	1268.97	9.55745	7.99788	5.02305	7.14675	3.45376	KALIMANTAN TENGAH	4.6413	0
62	2016	KALIMANTAN TENGAH	5.36	0.347	6.35	32.8996	13663.2	2.33	93.82	7062.7	367.827	1209.08	9.52254	8.86272	5.91033	7.09844	3.49346	KALIMANTAN TENGAH	4.04944	0
62	2017	KALIMANTAN TENGAH	5.26	0.327	6.73	34.3706	11722.4	2.31	96.49	7560.87	348.564	1635.04	9.36935	8.93087	5.85669	7.40003	3.5372	KALIMANTAN TENGAH	4.47133	0
62	2018	KALIMANTAN TENGAH	5.1	0.344	5.61	35.5484	22917.3	2.28	101.67	7829.09	280.263	1808.43	10.0397	8.96573	5.63929	7.50077	3.5709	KALIMANTAN TENGAH	3.42676	0
62	2019	KALIMANTAN TENGAH	4.81	0.335	6.12	37.8705	12533.4	2.26	93.94	8575.76	340.533	1970.57	9.43623	9.05681	5.83344	7.58659	3.63417	KALIMANTAN TENGAH	6.53205	0
62	2020	KALIMANTAN TENGAH	5.26	0.32	-1.41	37.1487	6215.56	1.84	87.38	8878.62	293.105	1654.24	8.73497	9.09151	5.68394	7.4117	3.61493	KALIMANTAN TENGAH	-1.90581	1
62	2021	KALIMANTAN TENGAH	5.16	0.32	3.59	37.955	8678.34	1.61	90.46	9409.29	320.27	1944.52	9.0687	9.14956	5.77228	7.57329	3.6364	KALIMANTAN TENGAH	2.17046	1
62	2022	KALIMANTAN TENGAH	5.22	0.309	6.45	39.8565	15182.4	1.51	98.85	8454.52	233.567	2728.82	9.62796	9.04257	5.45774	7.91199	3.68529	KALIMANTAN TENGAH	5.00974	1
62	2023	KALIMANTAN TENGAH	5.11	0.317	4.14	40.9596	19534.3	1.4	97.38	10234	350.176	2786.94	9.87998	9.23357	5.86129	7.93306	3.71259	KALIMANTAN TENGAH	2.76771	1
63	2010	KALIMANTAN SELATAN	5.21	0.366		23.4185	3832.68	1.99	158.54	4276.91	165.078	1190.84	8.25158	8.36122	5.11246	7.08325	3.15353	KALIMANTAN SELATAN		0
63	2011	KALIMANTAN SELATAN	5.29	0.353	6.97	24.5675	4585.29	2.40997	183.6	4760.93	181.949	1813.45	8.43083	8.46841	5.20921	7.50354	3.20143	KALIMANTAN SELATAN	4.9066	0
63	2012	KALIMANTAN SELATAN	5.01	0.364	5.97	25.5478	6142.85	1.91169	174.87	5369.11	207.369	2435.38	8.72321	8.5886	5.33931	7.79827	3.24055	KALIMANTAN SELATAN	3.99002	0
63	2013	KALIMANTAN SELATAN	4.76	0.356	5.33	26.4239	11475.9	1.84941	160.75	6567.4	310.967	2461.13	9.34809	8.79002	5.7429	7.80878	3.27427	KALIMANTAN SELATAN	3.42938	0
63	2014	KALIMANTAN SELATAN	4.81	0.326	4.84	27.2203	8867.45	1.76394	142.39	7356.85	276.226	2856.48	9.09026	8.90352	5.62483	7.95769	3.30396	KALIMANTAN SELATAN	3.01382	0
63	2015	KALIMANTAN SELATAN	4.72	0.334	3.82	27.7867	15320.2	1.70788	123.89	3543.89	159.559	2495.8	9.63699	8.17326	5.07866	7.82276	3.32456	KALIMANTAN SELATAN	2.08084	0
63	2016	KALIMANTAN SELATAN	4.52	0.351	4.4	28.5401	9514.6	1.81	115.54	9441.13	425.29	2371.05	9.16069	9.15294	6.05512	7.77151	3.35131	KALIMANTAN SELATAN	2.71126	0
63	2017	KALIMANTAN SELATAN	4.7	0.347	5.28	29.5788	6285.07	1.77	126.03	10484	356.159	2862.33	8.74609	9.2577	5.87818	7.95974	3.38706	KALIMANTAN SELATAN	3.63959	0
63	2018	KALIMANTAN SELATAN	4.65	0.34	5.08	30.6148	11845.4	1.74	147.44	9789.98	335.623	3568.81	9.37978	9.18922	5.81896	8.18027	3.42149	KALIMANTAN SELATAN	3.50271	0
63	2019	KALIMANTAN SELATAN	4.47	0.334	4.09	31.6115	15245.3	1.71	125.05	10755.6	400.137	3579.98	9.63209	9.28328	5.9943	8.18339	3.45352	KALIMANTAN SELATAN	3.25532	0
63	2020	KALIMANTAN SELATAN	4.83	0.351	-1.82	32.2123	7682.7	1.13	98.89	10834.4	354.818	2892.71	8.94686	9.29057	5.87442	7.97029	3.47235	KALIMANTAN SELATAN	1.9007	1
63	2021	KALIMANTAN SELATAN	4.56	0.325	3.48	32.8948	12676.8	1.61	132.86	11911.3	416.829	3384.41	9.44761	9.38533	6.03507	8.12723	3.49332	KALIMANTAN SELATAN	2.11891	1
63	2022	KALIMANTAN SELATAN	4.61	0.309	5.11	34.1332	15583.5	1.51	151.65	11390.2	335.784	4760.88	9.65403	9.3406	5.81944	8.4684	3.53027	KALIMANTAN SELATAN	3.76454	1
63	2023	KALIMANTAN SELATAN	4.29	0.313	4.84	35.3432	19964.2	1.31	131.06	12496.2	354.418	4410.38	9.90175	9.43326	5.8733	8.39194	3.56511	KALIMANTAN SELATAN	3.54511	1
64	2010	KALIMANTAN TIMUR	7.66	0.368		116.946	15652	3.81	153.36	5573.55	230.188	2223.79	9.65842	8.62597	5.44323	7.70742	4.76171	KALIMANTAN TIMUR		0
64	2011	KALIMANTAN TIMUR	6.77	0.323	6.47	121.196	10844	3.40266	151.75	6083.66	259.543	4073.48	9.29146	8.71353	5.56277	8.3125	4.79741	KALIMANTAN TIMUR	3.63408	0
64	2012	KALIMANTAN TIMUR	6.38	0.363	5.48	124.502	24376	2.66739	153.57	7064.6	340.596	5062.66	10.1014	8.86299	5.83363	8.52985	4.82432	KALIMANTAN TIMUR	2.72752	0
64	2013	KALIMANTAN TIMUR	6.38	0.366	2.76	133.869	31915.8	2.6246	158.83	11429.3	539.774	5719.36	10.3709	9.34402	6.293	8.65179	4.89686	KALIMANTAN TIMUR	7.52342	0
64	2014	KALIMANTAN TIMUR	6.31	0.361	1.71	133.086	39551.1	2.55748	160.1	8921.55	482.699	6585.5	10.5854	9.09634	6.18146	8.79278	4.891	KALIMANTAN TIMUR	-0.58458	0
64	2015	KALIMANTAN TIMUR	6.1	0.315	-1.2	128.603	42463.3	2.56874	167.19	4096.93	208.349	4649.5	10.6564	8.31824	5.344	8.44473	4.85673	KALIMANTAN TIMUR	-3.36848	0
64	2016	KALIMANTAN TIMUR	6	0.328	-0.38	125.385	22196.9	2.58	169.61	10022.6	481.469	4204.97	10.0078	9.21269	6.17892	8.34426	4.83139	KALIMANTAN TIMUR	-2.50198	0
64	2017	KALIMANTAN TIMUR	6.08	0.333	3.13	126.625	28392.3	2.31	168.27	9212.84	338.493	4669.93	10.2539	9.12846	5.82745	8.44911	4.84123	KALIMANTAN TIMUR	0.988703	0
64	2018	KALIMANTAN TIMUR	6.06	0.342	2.64	127.354	34449.6	2.28	168.16	9920.66	328.322	5927.89	10.4473	9.20248	5.79704	8.68759	4.84697	KALIMANTAN TIMUR	0.575715	0
64	2019	KALIMANTAN TIMUR	5.91	0.335	4.7	134.411	33920.8	2.24	170.05	12065.5	419.742	6414.51	10.4318	9.39819	6.04202	8.76647	4.9009	KALIMANTAN TIMUR	5.54074	0
64	2020	KALIMANTAN TIMUR	6.64	0.335	-2.9	125.765	31266.1	2.13	170.31	11602.3	370.97	5139.85	10.3503	9.35904	5.91881	8.54497	4.83441	KALIMANTAN TIMUR	-6.43255	1
64	2021	KALIMANTAN TIMUR	6.27	0.331	2.55	127.368	40930.5	1.5	189.25	12633.7	478.617	6215.83	10.6197	9.4442	6.17299	8.73502	4.84708	KALIMANTAN TIMUR	1.27503	1
64	2022	KALIMANTAN TIMUR	6.44	0.317	4.48	131.239	59514.6	1.41	158.72	13701.5	309.44	9329.81	10.994	9.52533	5.73799	9.14108	4.87702	KALIMANTAN TIMUR	3.03888	1
64	2023	KALIMANTAN TIMUR	6.11	0.322	6.22	137.51	72716.8	1.37	168.69	17447.3	356.162	8830.2	11.1943	9.767	5.87819	9.08605	4.9237	KALIMANTAN TIMUR	4.7789	1
65	2010	KALIMANTAN UTARA	7.66	0.368		70.79	2049.45	3.81	125.25	1135.29	53.1005	13.5501	7.62581	7.03552	3.99084	2.6776	4.25972	KALIMANTAN UTARA		0
65	2011	KALIMANTAN UTARA	6.77	0.323	6.47	72.45	1187.96	3.40266	127.15	1396.26	79.6635	29.6457	7.08083	7.24227	4.39029	3.42249	4.2829	KALIMANTAN UTARA	2.34496	0
65	2012	KALIMANTAN UTARA	6.38	0.363	5.48	73.64	989.49	2.66739	129.1	1722.87	83.3534	38.4026	6.8982	7.45233	4.43502	3.67383	4.29919	KALIMANTAN UTARA	1.64251	0
65	2013	KALIMANTAN UTARA	6.38	0.366	2.76	74.1069	977.42	2.6246	130.05	2482.84	142.612	52.3318	6.88594	7.81756	4.96711	3.97653	4.30551	KALIMANTAN UTARA	0.634071	0
65	2014	KALIMANTAN UTARA	6.31	0.361	8.18	77.1526	1990.33	2.55748	132.12	2313.91	146.169	62.7704	7.59656	7.74713	4.99158	4.15529	4.34579	KALIMANTAN UTARA	4.10983	0
65	2015	KALIMANTAN UTARA	6.32	0.314	3.4	76.8235	4107.33	2.56874	130.56	1848.83	140.144	382.058	8.32077	7.52285	4.94978	5.94819	4.34151	KALIMANTAN UTARA	-0.426609	0
65	2016	KALIMANTAN UTARA	6.99	0.305	3.55	76.6355	5506.34	3.8	132.56	2077.75	130.632	322.823	8.61384	7.63952	4.88001	5.7802	4.33906	KALIMANTAN UTARA	-0.244717	0
65	2017	KALIMANTAN UTARA	6.96	0.313	6.8	78.9186	2872.09	3.9	132.49	2447.7	104.005	412.068	7.96314	7.80331	4.65401	6.02361	4.36842	KALIMANTAN UTARA	2.97918	0
65	2018	KALIMANTAN UTARA	6.86	0.304	5.36	80.2048	2331.77	3.87	135.9	2535.56	94.699	497.315	7.75481	7.83857	4.56121	6.21123	4.38458	KALIMANTAN UTARA	1.62987	0
65	2019	KALIMANTAN UTARA	6.49	0.292	6.89	88.2995	5536.21	3.84	147.43	2740.83	90.2576	551.406	8.61925	7.91638	4.51369	6.31428	4.48073	KALIMANTAN UTARA	10.0925	0
65	2020	KALIMANTAN UTARA	7.41	0.3	-1.09	86.8236	3200.39	2.86	150.37	3059.28	99.4117	470.593	8.07134	8.02626	4.60928	6.15612	4.46388	KALIMANTAN UTARA	-1.6715	1
65	2021	KALIMANTAN UTARA	6.83	0.285	3.99	88.9735	5696.86	2.25	159.88	3429.79	162.807	559.188	8.64785	8.14055	5.09869	6.32827	4.48834	KALIMANTAN UTARA	2.47619	1
65	2022	KALIMANTAN UTARA	6.86	0.27	5.32	92.393	14299.1	2.1	169.27	3360.61	71.6063	828.195	9.56802	8.12018	4.28505	6.72046	4.52605	KALIMANTAN UTARA	3.84323	1
65	2023	KALIMANTAN UTARA	6.45	0.277	4.94	95.6381	27810.2	1.44	165.7	3786.37	76.8861	722.065	10.2332	8.23943	4.35525	6.5835	4.56057	KALIMANTAN UTARA	3.5123	1
71	2010	SULAWESI UTARA	9.1	0.37		22.7078	2134.9	1.28	52.11	2474.47	109.46	468.924	7.66664	7.81418	4.70466	6.15257	3.12271	SULAWESI UTARA		0
71	2011	SULAWESI UTARA	8.51	0.358	6.17	23.813	2328.16	1.55906	81.7	3412.32	144.265	631.886	7.75326	8.13544	4.97856	6.45029	3.17023	SULAWESI UTARA	4.86696	0
71	2012	SULAWESI UTARA	7.64	0.43	6.86	25.146	1129.61	1.21422	88.89	3479.37	156.814	765.252	7.03051	8.15489	5.06142	6.64151	3.2247	SULAWESI UTARA	5.59775	0
71	2013	SULAWESI UTARA	8.5	0.446	6.38	26.4459	867.65	1.11397	58.2	3587.5	200.37	914.801	6.76694	8.18549	5.30514	6.8198	3.2751	SULAWESI UTARA	5.16942	0
71	2014	SULAWESI UTARA	8.26	0.436	6.31	27.8055	1307.73	1.14407	65.49	4135.11	187.817	1110.18	7.17681	8.32751	5.24078	7.01318	3.32523	SULAWESI UTARA	5.1413	0
71	2015	SULAWESI UTARA	8.98	0.366	6.12	29.1965	1483.97	1.04734	45.62	1370.26	61.1557	1212.57	7.30315	7.22348	4.12964	7.10133	3.37405	SULAWESI UTARA	5.00242	0
71	2016	SULAWESI UTARA	8.2	0.379	6.16	30.68	10213	1.13	49.34	5581.16	336.405	1245.37	9.23151	8.62733	5.82128	7.12799	3.42361	SULAWESI UTARA	5.08109	0
71	2017	SULAWESI UTARA	7.9	0.394	6.31	32.2971	8030.85	1.11	49.19	6177.31	358.78	1477.82	8.99117	8.7288	5.88549	7.299	3.47498	SULAWESI UTARA	5.2709	0
71	2018	SULAWESI UTARA	7.59	0.372	6	33.9116	8604.3	1.09	50.21	6510.85	315.237	1591.22	9.06013	8.78138	5.75649	7.37289	3.52376	SULAWESI UTARA	4.999	0
71	2019	SULAWESI UTARA	7.51	0.376	5.65	35.6874	11324.4	1.07	48.34	7153.21	328.25	1659.35	9.3348	8.87546	5.79682	7.41478	3.5748	SULAWESI UTARA	5.23664	0
71	2020	SULAWESI UTARA	7.78	0.368	-0.99	33.6704	5201.64	1.4	43.1	7411.8	250.959	1384.78	8.55692	8.91096	5.52927	7.23401	3.51662	SULAWESI UTARA	-5.65185	1
71	2021	SULAWESI UTARA	7.36	0.359	4.16	34.7764	5892.62	0.85	46.03	7290.22	290.006	1600.09	8.68163	8.89443	5.67335	7.37844	3.54894	SULAWESI UTARA	3.28475	1
71	2022	SULAWESI UTARA	7.34	0.359	5.42	36.3686	6695.91	0.82	44.83	6851.82	186.448	1867.42	8.8094	8.83242	5.2335	7.53285	3.59371	SULAWESI UTARA	4.57842	1
71	2023	SULAWESI UTARA	7.38	0.37	5.48	38.0642	10837.9	0.82	43.94	7007.68	178.586	1987.09	9.29089	8.8549	5.19066	7.59493	3.63927	SULAWESI UTARA	4.66215	1
72	2010	SULAWESI TENGAH	18.07	0.366		19.5585	1398.38	1.95	69.98	2765.77	103.593	401.402	7.24378	7.92543	4.65007	5.99745	2.97341	SULAWESI TENGAH		0
72	2011	SULAWESI TENGAH	15.83	0.388	9.82	21.1057	5978.58	2.20114	70.98	3274.1	121.437	546.711	8.69611	8.0941	4.8076	6.30575	3.04954	SULAWESI TENGAH	7.91046	0
72	2012	SULAWESI TENGAH	14.94	0.387	9.53	22.7245	8401.96	1.70813	78.86	3744.69	139.28	614.348	9.03634	8.22836	4.94364	6.42219	3.12344	SULAWESI TENGAH	7.66982	0
72	2013	SULAWESI TENGAH	14.32	0.391	9.59	24.491	11027.3	1.71595	76.33	4114.56	202.12	703.553	9.30822	8.32253	5.3138	6.55756	3.1983	SULAWESI TENGAH	7.7736	0
72	2014	SULAWESI TENGAH	13.61	0.352	5.07	25.3163	18683.2	1.61522	78.9	4766.43	234.278	892.771	9.83543	8.46956	5.46077	6.79545	3.23145	SULAWESI TENGAH	3.36977	0
72	2015	SULAWESI TENGAH	14.07	0.37	15.5	28.7786	15938.3	1.62487	75.46	2980.3	136.263	986.6	9.67654	8.00012	4.9219	6.89528	3.35963	SULAWESI TENGAH	13.6765	0
72	2016	SULAWESI TENGAH	14.09	0.347	9.94	31.1511	22583.4	1.67	100.95	6718.04	293.239	1057.18	10.025	8.8127	5.68439	6.9643	3.43885	SULAWESI TENGAH	8.24375	0
72	2017	SULAWESI TENGAH	14.22	0.345	7.1	32.8605	22868.8	1.65	120.18	5777.12	265.071	1106.88	10.0376	8.66183	5.58376	7.0102	3.49227	SULAWESI TENGAH	5.48745	0
72	2018	SULAWESI TENGAH	13.69	0.317	20.56	39.0493	18226.2	1.63	131.1	7718.65	308.381	1168.77	9.81067	8.95152	5.73457	7.06457	3.66483	SULAWESI TENGAH	18.8338	0
72	2019	SULAWESI TENGAH	13.18	0.33	8.83	42.0545	29530.6	1.61	136.14	8815.6	336.452	1271.72	10.2932	9.08439	5.82142	7.14891	3.73897	SULAWESI TENGAH	7.69577	0
72	2020	SULAWESI TENGAH	13.06	0.321	4.86	45.0523	30353.9	1.22	146.04	9161.68	287.028	1295.19	10.3207	9.12289	5.66306	7.16718	3.80782	SULAWESI TENGAH	7.12842	1
72	2021	SULAWESI TENGAH	12.18	0.326	11.68	49.6902	41796.9	1.62	167.15	9174.7	314.003	1532.36	10.6406	9.12431	5.75258	7.33521	3.90581	SULAWESI TENGAH	10.2945	1
72	2022	SULAWESI TENGAH	12.3	0.305	15.22	56.5771	121521	1.53	187.6	8893.74	242.854	1876.6	11.7078	9.09321	5.49657	7.53775	4.0356	SULAWESI TENGAH	13.8595	1
72	2023	SULAWESI TENGAH	12.41	0.304	11.91	62.5841	116447	1.22	185.58	9345.88	225.982	1844.75	11.6652	9.1428	5.42487	7.52064	4.13651	SULAWESI TENGAH	10.6174	1
73	2010	SULAWESI SELATAN	11.6	0.404		21.3067	7184.08	1.17	74.04	6798.43	215.894	264.892	8.87976	8.82459	5.37941	5.58309	3.05902	SULAWESI SELATAN		0
73	2011	SULAWESI SELATAN	10.29	0.427	8.13	22.7692	4798.47	1.50844	62.92	8698.71	252.932	2168.08	8.47626	9.07104	5.53707	7.68206	3.12541	SULAWESI SELATAN	6.86389	0
73	2012	SULAWESI SELATAN	9.82	0.418	8.87	24.5072	7952.4	1.15253	59.35	10093.7	323.638	2632.47	8.98135	9.21977	5.78271	7.87606	3.19897	SULAWESI SELATAN	7.63303	0
73	2013	SULAWESI SELATAN	10.32	0.432	7.62	26.0834	6561.79	1.11515	53.61	10391.2	395.369	3149.24	8.78917	9.24881	5.98234	8.05523	3.2613	SULAWESI SELATAN	6.43179	0
73	2014	SULAWESI SELATAN	9.54	0.448	7.54	27.7495	8444.29	1.07888	57.09	12915.8	419.154	3754.6	9.04136	9.46628	6.04062	8.231	3.32322	SULAWESI SELATAN	6.38739	0
73	2015	SULAWESI SELATAN	10.12	0.404	7.19	29.4359	12434.3	1.04364	48.27	9731.77	225.97	4114.26	9.4283	9.18325	5.42482	8.32246	3.38222	SULAWESI SELATAN	6.07741	0
73	2016	SULAWESI SELATAN	9.24	0.4	7.42	31.3025	8339.05	1.1	31.12	12332.8	467.775	4452.35	9.02882	9.4201	6.15012	8.40141	3.4437	SULAWESI SELATAN	6.34127	0
73	2017	SULAWESI SELATAN	9.48	0.429	7.21	33.2341	11626.3	1.08	23.36	18200.6	529.347	4979.58	9.36111	9.80927	6.27353	8.5133	3.50358	SULAWESI SELATAN	6.17068	0
73	2018	SULAWESI SELATAN	8.87	0.388	7.04	35.2436	12213.4	1.06	22.23	19108.5	533.816	5270.3	9.41037	9.85794	6.28192	8.57003	3.56229	SULAWESI SELATAN	6.04659	0
73	2019	SULAWESI SELATAN	8.56	0.391	6.91	37.4743	9879.21	1.05	20.87	20302	522.085	5734.3	9.19829	9.91852	6.25974	8.6544	3.62366	SULAWESI SELATAN	6.32923	0
73	2020	SULAWESI SELATAN	8.99	0.382	-0.71	36.2463	12471.6	1.18	25.1	20556.4	444.595	5209.06	9.43129	9.93098	6.09941	8.55835	3.59034	SULAWESI SELATAN	-3.27699	1
73	2021	SULAWESI SELATAN	8.53	0.377	4.64	37.5014	16498.1	0.97	23.3	19059.2	566.812	5822.63	9.71106	9.85536	6.34179	8.66968	3.62438	SULAWESI SELATAN	3.46295	1
73	2022	SULAWESI SELATAN	8.66	0.365	5.1	38.9733	14905.9	0.96	26.89	19102.3	290.564	6712.54	9.60958	9.85762	5.67526	8.81188	3.66288	SULAWESI SELATAN	3.92467	1
73	2023	SULAWESI SELATAN	8.7	0.377	4.51	40.2852	16659.1	1.15	22.13	21398.2	287.552	8232.66	9.72077	9.97111	5.66488	9.01599	3.69599	SULAWESI SELATAN	3.36638	1
74	2010	SULAWESI TENGGARA	17.05	0.421		21.5731	144.83	2.08	59.21	2281.33	91.0528	238.264	4.98244	7.73295	4.52236	5.47757	3.07145	SULAWESI TENGGARA		0
74	2011	SULAWESI TENGGARA	14.56	0.389	10.63	23.3381	213.16	2.75016	67.21	3078.71	100.975	324.332	5.36672	8.03259	4.62473	5.78485	3.15009	SULAWESI TENGGARA	8.1813	0
74	2012	SULAWESI TENGGARA	13.06	0.403	11.65	25.4898	1252.78	2.26678	60.54	3242.85	124.029	411.275	7.13392	8.08452	4.82855	6.02169	3.23828	SULAWESI TENGGARA	9.21979	0
74	2013	SULAWESI TENGGARA	13.73	0.391	7.5	26.8154	2314.97	2.17391	61.22	3720.5	159.987	498.315	7.74758	8.22188	5.08132	6.21324	3.28897	SULAWESI TENGGARA	5.2004	0
74	2014	SULAWESI TENGGARA	12.77	0.399	6.26	27.896	3262.66	2.12766	48.32	4554.1	161.663	601.577	8.0906	8.424	5.09168	6.40121	3.32849	SULAWESI TENGGARA	4.03012	0
74	2015	SULAWESI TENGGARA	13.74	0.381	6.88	29.2027	4015.81	2.12418	32.68	1957.72	84.3456	678.247	8.29824	7.58004	4.44671	6.52098	3.37426	SULAWESI TENGGARA	4.684	0
74	2016	SULAWESI TENGGARA	12.77	0.388	6.51	30.4764	6847.61	2.16	28.33	5716.75	235.752	766.664	8.8318	8.65133	5.46701	6.64335	3.41695	SULAWESI TENGGARA	4.36155	0
74	2017	SULAWESI TENGGARA	11.97	0.404	6.76	31.8944	12537.2	2.14	33.32	6500.1	267.716	845.466	9.43654	8.77973	5.59366	6.74107	3.46243	SULAWESI TENGGARA	4.65288	0
74	2018	SULAWESI TENGGARA	11.32	0.392	6.4	33.2787	11348.1	2.12	48.35	6997.54	259.52	928.036	9.33689	8.85346	5.56268	6.83415	3.50492	SULAWESI TENGGARA	4.34007	0
74	2019	SULAWESI TENGGARA	11.04	0.393	6.5	35.3099	17556.6	2.1	57.95	7978.41	263.926	1140.65	9.77324	8.98462	5.57945	7.04023	3.56416	SULAWESI TENGGARA	6.10373	0
74	2020	SULAWESI TENGGARA	11.69	0.388	-0.65	35.7086	20759	1.58	72.46	8387.02	282.715	1045.11	9.94078	9.03456	5.64797	6.95283	3.57539	SULAWESI TENGGARA	1.12915	1
74	2021	SULAWESI TENGGARA	11.74	0.394	4.1	36.5705	27399.4	1.75	111.29	8254.08	280.664	1385.09	10.2183	9.01858	5.64071	7.23424	3.59924	SULAWESI TENGGARA	2.41362	1
74	2022	SULAWESI TENGGARA	11.27	0.366	5.53	37.9561	21406.8	1.66	124.36	8640.5	229.267	1587.46	9.97151	9.06433	5.43924	7.37052	3.63643	SULAWESI TENGGARA	3.78901	1
74	2023	SULAWESI TENGGARA	11.43	0.371	5.35	39.3425	14645.8	1.69	87.62	9195.64	214.869	1893.76	9.59197	9.12659	5.37467	7.54685	3.6723	SULAWESI TENGGARA	3.65245	1
75	2010	GORONTALO	23.19	0.431		14.812	23.75	2.26	62.42	1080.86	40.4152	141.754	3.20883	6.98644	3.72365	4.96112	2.69543	GORONTALO		0
75	2011	GORONTALO	18.75	0.4	7.71	15.6876	125.51	2.19189	63.59	1555.23	57.2573	174.476	4.84032	7.35002	4.06487	5.1675	2.75287	GORONTALO	5.91212	0
75	2012	GORONTALO	17.22	0.413	7.91	16.6503	506.42	1.59925	71.48	1572.73	67.6402	216.811	6.22934	7.36121	4.22888	5.38363	2.81243	GORONTALO	6.13616	0
75	2013	GORONTALO	18.01	0.445	7.67	17.6391	397.64	1.66667	69.56	1780.68	96.9647	245.086	5.98806	7.48531	4.58461	5.50568	2.87012	GORONTALO	5.93894	0
75	2014	GORONTALO	17.41	0.453	7.27	18.6224	96.06	1.63934	71.07	1946.3	96.1863	311.683	4.57533	7.5742	4.57663	5.74519	2.92437	GORONTALO	5.57465	0
75	2015	GORONTALO	18.16	0.401	6.22	19.4741	189.79	1.5233	67.2	1841.94	93.8282	334.553	5.25117	7.51912	4.55207	5.81578	2.96909	GORONTALO	4.57346	0
75	2016	GORONTALO	17.63	0.41	6.52	20.4275	2372.93	1.62	63.69	2649.45	116.243	387.455	7.7723	7.88249	4.76425	5.96218	3.01688	GORONTALO	4.89537	0
75	2017	GORONTALO	17.14	0.405	6.73	21.4778	1448.39	1.61	61.72	3093.21	177.83	423.797	7.2789	8.03729	5.18644	6.05161	3.06702	GORONTALO	5.14171	0
75	2018	GORONTALO	15.83	0.417	6.49	22.5386	3257.93	1.59	66.05	3145.5	148.703	475.544	8.08915	8.05405	5.00865	6.16656	3.11523	GORONTALO	4.93892	0
75	2019	GORONTALO	15.31	0.41	6.4	24.1676	3225.71	1.58	64.43	3504.8	151.578	536.95	8.07922	8.16217	5.02767	6.28777	3.18501	GORONTALO	7.22766	0
75	2020	GORONTALO	15.59	0.406	-0.02	24.3134	1636.88	1.16	60.61	3578.52	128.55	466.165	7.40116	8.18298	4.86407	6.14668	3.19103	GORONTALO	0.603371	1
75	2021	GORONTALO	15.41	0.409	2.4	24.5942	2117.35	1.06	64.99	3818.94	152.44	531.371	7.65839	8.24799	5.03331	6.27734	3.20251	GORONTALO	1.15488	1
75	2022	GORONTALO	15.51	0.423	4.04	25.2702	2732.15	1.02	64.01	3319.69	100.296	596.369	7.91321	8.10793	4.61805	6.39254	3.22963	GORONTALO	2.7489	1
75	2023	GORONTALO	15.15	0.417	4.5	26.0864	4481.78	1.27	63.57	3503.86	102.961	640.11	8.408	8.16191	4.64402	6.4632	3.26142	GORONTALO	3.22989	1
76	2010	SULAWESI BARAT	13.58	0.364		14.7555	1175.78	2.68	118	1049.82	42.7478	90.6282	7.07054	6.95733	3.77844	4.51774	2.69161	SULAWESI BARAT		0
76	2011	SULAWESI BARAT	13.89	0.371	10.73	16.0235	269.57	2.5287	121.05	1250.68	42.7766	108.94	5.60053	7.13224	3.7791	4.69994	2.77405	SULAWESI BARAT	8.59329	0
76	2012	SULAWESI BARAT	13.01	0.335	9.25	17.1691	230.77	1.93603	120.52	1395.06	63.4274	145.496	5.44575	7.24141	4.16554	4.98699	2.84311	SULAWESI BARAT	7.14958	0
76	2013	SULAWESI BARAT	12.23	0.324	6.93	18.0088	715.78	1.89926	107.89	1520.02	69.716	161.667	6.57477	7.32713	4.25867	5.09171	2.89086	SULAWESI BARAT	4.89107	0
76	2014	SULAWESI BARAT	12.05	0.378	8.86	19.2321	892	1.94489	103.51	1738.57	80.0154	258.553	6.79459	7.46139	4.39464	5.55896	2.95658	SULAWESI BARAT	6.79245	0
76	2015	SULAWESI BARAT	11.9	0.362	7.31	20.2505	1131.75	1.90779	102.9	356.104	27.4534	293.736	7.0324	5.87803	3.34827	5.68608	3.00818	SULAWESI BARAT	5.29564	0
76	2016	SULAWESI BARAT	11.19	0.371	6.01	21.0679	361.27	1.93	100.12	2657.85	106.182	319.072	5.89239	7.88565	4.67453	5.76855	3.04775	SULAWESI BARAT	4.03644	0
76	2017	SULAWESI BARAT	11.18	0.339	6.39	22.001	814.52	1.93	97.88	2762.16	114.351	326.817	6.70383	7.92413	4.74798	5.79245	3.09109	SULAWESI BARAT	4.42901	0
76	2018	SULAWESI BARAT	11.22	0.366	6.26	22.9531	3501.89	1.92	95.45	2800.69	119.042	350.519	8.16134	7.93798	4.78785	5.86227	3.13345	SULAWESI BARAT	4.32739	0
76	2019	SULAWESI BARAT	10.95	0.365	5.56	24.1636	1328.12	1.91	95.98	3271.4	108.136	377.715	7.19227	8.09328	4.6926	5.93678	3.18485	SULAWESI BARAT	5.27372	0
76	2020	SULAWESI BARAT	11.5	0.356	-2.34	22.6662	345	1.98	89.71	3814.24	84.1817	370.677	5.84644	8.24676	4.44479	5.91802	3.12088	SULAWESI BARAT	-6.19669	1
76	2021	SULAWESI BARAT	11.85	0.366	2.57	22.8982	479.77	1.66	89.89	3486.77	111.723	426.092	6.17539	8.15702	4.72493	6.057	3.13106	SULAWESI BARAT	1.02351	1
76	2022	SULAWESI BARAT	11.92	0.371	2.31	23.0711	1758.31	1.58	90.47	3424.4	80.4519	470.645	7.47268	8.13897	4.40001	6.15623	3.13858	SULAWESI BARAT	0.75495	1
76	2023	SULAWESI BARAT	11.49	0.351	5.25	23.9191	2385.3	1.56	83.86	3942.99	86.7541	486.353	7.7775	8.27995	4.47454	6.18899	3.17468	SULAWESI BARAT	3.6756	1
81	2010	MALUKU	27.74	0.329		11.9518	25.97	2.8	83.05	1817.23	80.3347	147.097	3.29473	7.50562	4.39857	4.99787	2.48089	MALUKU		0
81	2011	MALUKU	23	0.356	6.34	12.4772	106.13	2.44539	80.43	2110.77	96.5593	214.364	4.67404	7.65528	4.58046	5.37233	2.5239	MALUKU	4.39556	0
81	2012	MALUKU	20.76	0.382	7.16	13.1291	85.75	1.84596	87.76	2231.89	124.786	259.85	4.46303	7.71105	4.83458	5.56394	2.57483	MALUKU	5.22489	0
81	2013	MALUKU	19.27	0.347	5.24	13.5721	643.12	1.75	83.04	2480.94	136.943	288.925	6.46789	7.81679	4.92684	5.66962	2.60801	MALUKU	3.37388	0
81	2014	MALUKU	18.44	0.33	6.64	14.2196	163.01	1.78133	75.58	2706.33	135.22	381.232	5.09993	7.90372	4.91427	5.94603	2.65462	MALUKU	4.7712	0
81	2015	MALUKU	19.36	0.338	5.48	14.7404	1136.58	1.8105	80.84	2740.6	144.037	422.672	7.03666	7.9163	4.97699	6.04896	2.69059	MALUKU	3.66226	0
81	2016	MALUKU	19.26	0.344	5.73	15.3212	1390.4	1.79	86.67	3729.02	239.692	486.47	7.23807	8.22417	5.48352	6.18923	2.72924	MALUKU	3.9402	0
81	2017	MALUKU	18.29	0.321	5.82	15.9425	2923.82	1.78	83.94	5034.51	278.752	476.251	7.98099	8.52427	5.6339	6.16804	2.76899	MALUKU	4.05498	0
81	2018	MALUKU	17.85	0.326	5.91	16.607	1128.79	1.77	70.71	5521.78	204.211	537.008	7.02979	8.61664	5.32404	6.28787	2.80983	MALUKU	4.16856	0
81	2019	MALUKU	17.65	0.32	5.41	17.5569	742.51	1.75	64.75	5293.87	189.958	561.93	6.61138	8.57449	5.25206	6.33316	2.86544	MALUKU	5.71951	0
81	2020	MALUKU	17.99	0.326	-0.91	16.6881	2967.16	1.83	53.79	5703.79	161.909	543.893	7.9957	8.64906	5.09319	6.30059	2.8147	MALUKU	-4.94815	1
81	2021	MALUKU	16.3	0.316	3.63	17.0532	3129.75	0.99	59.54	6089.2	200.997	566.813	8.04903	8.71444	5.30825	6.34179	2.83633	MALUKU	2.18736	1
81	2022	MALUKU	16.23	0.306	5.31	17.7169	1766.3	1.01	58.09	5267.6	130.82	714.612	7.47721	8.56952	4.88144	6.57314	2.87452	MALUKU	3.89213	1
81	2023	MALUKU	16.42	0.288	5.21	18.3927	3543.37	1.39	52.3	5994.27	125.227	775.595	8.17312	8.69873	4.83808	6.65492	2.91195	MALUKU	3.81433	1
82	2010	MALUKU UTARA	9.42	0.336		14.3615	2211.82	2.47	85.46	1132.72	76.6152	85.5153	7.70202	7.03326	4.35176	4.46032	2.66455	MALUKU UTARA		0
82	2011	MALUKU UTARA	9.18	0.343	6.8	14.9946	1190.92	2.78393	109.22	1352.07	81.9861	111.018	7.08332	7.21013	4.41867	4.71866	2.70769	MALUKU UTARA	4.40823	0
82	2012	MALUKU UTARA	8.06	0.306	6.98	15.691	1193.26	2.2493	100.46	1407.2	101.27	128.882	7.08528	7.25006	4.62762	4.86663	2.75309	MALUKU UTARA	4.6442	0
82	2013	MALUKU UTARA	7.64	0.32	6.36	16.3322	4387.25	2.19982	115.18	1923.18	129.647	190.494	8.38669	7.56225	4.8725	5.25486	2.79314	MALUKU UTARA	4.08648	0
82	2014	MALUKU UTARA	7.41	0.322	5.49	16.8695	1384.38	2.15247	117.77	2038.03	122.434	207.432	7.23373	7.62023	4.81571	5.33961	2.82551	MALUKU UTARA	3.28982	0
82	2015	MALUKU UTARA	6.22	0.286	6.1	17.5338	2860.04	2.01932	144.15	865.28	45.9802	244.792	7.95894	6.76421	3.84973	5.50449	2.86413	MALUKU UTARA	3.93763	0
82	2016	MALUKU UTARA	6.41	0.309	5.77	18.1773	5905.86	2.16	160.67	2869.97	142.633	291.886	8.68387	7.96241	4.96726	5.67978	2.90017	MALUKU UTARA	3.67017	0
82	2017	MALUKU UTARA	6.44	0.33	7.67	19.193	4241.07	2.13	178.91	3315	210.146	350.263	8.35281	8.10651	5.35255	5.86154	2.95454	MALUKU UTARA	5.58757	0
82	2018	MALUKU UTARA	6.62	0.336	7.86	20.3095	7529.88	2.11	139.52	3653.99	184.62	389.262	8.92677	8.20385	5.2237	5.96682	3.01109	MALUKU UTARA	5.81713	0
82	2019	MALUKU UTARA	6.91	0.31	6.25	21.525	14702.1	2.08	160.4	4284.84	183.094	476.074	9.59582	8.36307	5.21544	6.16767	3.06921	MALUKU UTARA	5.9851	0
82	2020	MALUKU UTARA	6.97	0.29	5.39	21.915	34641.2	2.07	172.4	4290.59	183.486	474.974	10.4528	8.36441	5.21757	6.16536	3.08717	MALUKU UTARA	1.81203	1
82	2021	MALUKU UTARA	6.38	0.278	16.79	25.1907	42902.9	1.69	305.94	4578.42	199.735	593.021	10.6667	8.42933	5.30199	6.38691	3.22648	MALUKU UTARA	14.9472	1
82	2022	MALUKU UTARA	6.37	0.309	22.94	30.5265	74007.2	1.61	404.87	4358.88	177.478	858.631	11.2119	8.3802	5.18446	6.7565	3.41859	MALUKU UTARA	21.1815	1
82	2023	MALUKU UTARA	6.46	0.3	20.49	36.2673	83953.9	1.52	404.05	5493.91	213.437	1204.66	11.338	8.61158	5.36802	7.09478	3.59092	MALUKU UTARA	18.806	1
91	2010	PAPUA BARAT	34.88	0.381		54.0493	205.57	3.71	119.1	1698.99	231.317	114.747	5.33064	7.43838	5.4481	4.75141	3.9899	PAPUA BARAT		0
91	2011	PAPUA BARAT	31.92	0.374	3.64	54.5399	347.2	3.36665	93.1	1974.29	205.342	143.886	5.85278	7.58847	5.32954	4.97595	3.99893	PAPUA BARAT	0.907578	0
91	2012	PAPUA BARAT	27.04	0.407	3.63	55.0478	355.61	2.67176	128.55	2181.86	260.682	182.442	5.87664	7.68839	5.56713	5.2119	4.0082	PAPUA BARAT	0.931392	0
91	2013	PAPUA BARAT	27.14	0.418	7.36	57.5814	964.06	2.60223	119.33	2692.77	302.548	239.208	6.87219	7.8987	5.71554	5.4815	4.0532	PAPUA BARAT	4.6024	0
91	2014	PAPUA BARAT	26.26	0.405	5.38	59.1426	2007.71	2.657	140.49	2817.83	348.751	310.788	7.60525	7.94408	5.85722	5.74232	4.07995	PAPUA BARAT	2.71135	0
91	2015	PAPUA BARAT	25.73	0.428	4.15	60.0641	3630.94	2.58824	103.28	1798.02	143.317	316.264	8.19752	7.495	4.97201	5.75974	4.09541	PAPUA BARAT	1.55817	0
91	2016	PAPUA BARAT	24.88	0.401	4.52	61.242	6923.3	2.61	75.16	4247.59	438.848	352.78	8.84279	8.35434	6.08643	5.86868	4.11483	PAPUA BARAT	1.96104	0
91	2017	PAPUA BARAT	23.12	0.387	4.02	62.17	1206.36	2.59	96.51	4160.65	474.106	441.262	7.09619	8.33367	6.16354	6.0919	4.12987	PAPUA BARAT	1.51522	0
91	2018	PAPUA BARAT	22.66	0.391	6.25	64.4994	4204.89	2.57	111.36	4673.36	433.386	497.631	8.34424	8.44985	6.07393	6.21187	4.16666	PAPUA BARAT	3.74697	0
91	2019	PAPUA BARAT	21.51	0.381	2.66	64.4185	1022.52	2.55	92.8	5383.8	507.906	555.206	6.931	8.59134	6.23226	6.32114	4.1654	PAPUA BARAT	-0.125474	0
91	2020	PAPUA BARAT	21.7	0.376	-0.76	54.4877	2074.67	3.94	77.68	5581.98	520.222	512.833	7.63804	8.62748	6.25618	6.2419	3.99797	PAPUA BARAT	-15.4161	1
91	2021	PAPUA BARAT	21.82	0.374	-0.51	53.3242	1099.32	2.69	71.62	4878.28	470.333	569.812	7.00336	8.49275	6.15556	6.34706	3.97639	PAPUA BARAT	-2.13534	1
91	2022	PAPUA BARAT	21.43	0.384	2.01	53.5068	3269.09	2.46	83.71	5285.43	470.242	728.685	8.09257	8.5729	6.15537	6.59261	3.97981	PAPUA BARAT	0.342434	1
91	2023	PAPUA BARAT	20.49	0.37	5.18	71.9049	1705.5	1.75	85.69	7182.84	427.258	727.561	7.4422	8.87959	6.05972	6.59107	4.27534	PAPUA BARAT	34.3846	1
94	2010	PAPUA	36.8	0.414		38.7851	3141.51	5.39	116.6	4551.71	417.752	360.156	8.05278	8.42348	6.03728	5.88931	3.65804	PAPUA		0
94	2011	PAPUA	31.98	0.384	-4.28	36.3832	13275.5	2.87993	106.01	5236.36	472.864	434.498	9.49375	8.56357	6.16092	6.07649	3.59411	PAPUA	-6.19276	0
94	2012	PAPUA	30.66	0.446	1.72	36.28	11682.2	2.02401	98.16	5627.36	573.454	647.364	9.36591	8.63557	6.35342	6.47445	3.59127	PAPUA	-0.283675	0
94	2013	PAPUA	31.53	0.441	8.55	38.6214	29350.3	1.98386	87.5	7136.34	682.363	669	10.2871	8.87309	6.52703	6.50728	3.65381	PAPUA	6.4535	0
94	2014	PAPUA	27.8	0.459	3.65	39.2719	15931.8	1.9123	93.29	8531.46	794.047	898.851	9.67613	9.05163	6.6784	6.80223	3.67051	PAPUA	1.68435	0
94	2015	PAPUA	28.4	0.392	7.35	41.377	13650	1.87642	83.41	4235.59	466.934	1080.57	9.52157	8.35151	6.14833	6.98617	3.72272	PAPUA	5.3603	0
94	2016	PAPUA	28.4	0.399	9.14	44.3421	15919.6	1.95	75.9	11591.7	868.161	1143.72	9.67537	9.35813	6.76753	7.04292	3.79194	PAPUA	7.16623	0
94	2017	PAPUA	27.76	0.398	4.64	45.577	27285.7	1.93	77.33	10212.4	872.855	1301.67	10.2142	9.23146	6.77291	7.17217	3.8194	PAPUA	2.78496	0
94	2018	PAPUA	27.43	0.398	7.32	48.0694	16501	1.9	87.82	12902.7	875.303	1305.62	9.71124	9.46527	6.77571	7.1752	3.87265	PAPUA	5.46845	0
94	2019	PAPUA	26.55	0.391	-15.74	40.2034	13648	1.88	77.04	13791.9	776.467	2047.83	9.52142	9.53191	6.65604	7.62503	3.69395	PAPUA	-16.3638	0
94	2020	PAPUA	26.8	0.395	2.39	32.1085	10729.2	4.13	74.69	13721.9	679.773	1457.09	9.28082	9.52682	6.52323	7.28489	3.46912	PAPUA	-20.1349	1
94	2021	PAPUA	27.38	0.396	15.16	36.4201	22158.4	1.61	91.18	12390.5	848.775	2318.53	10.006	9.42476	6.74497	7.74912	3.59512	PAPUA	13.4283	1
94	2022	PAPUA	26.8	0.393	8.97	39.1127	21141.2	1.52	104.89	12232.6	610.56	1958.28	9.95902	9.41194	6.41601	7.58033	3.66645	PAPUA	7.39305	1
94	2023	PAPUA	26.03	0.386	4.2	47.3239	1302.04	1.39	97.87	16750.7	747.658	1596.36	7.17246	9.72626	6.61828	7.37611	3.85701	PAPUA	20.9936	1
